1 **The IgE production is initially induced in subcutaneous fat and depends on**  
2 **extrafollicular B cells**

3

4 Dmitrii Borisovich Chudakov<sup>1\*</sup>, Gulnar Vaisovna Fattakhova<sup>1</sup>, Mariya Vladimirovna  
5 Konovalova<sup>1</sup>, Daria Sergeevna Tsaregorotseva<sup>2</sup>, Marina Alexandrovna Shevchenko<sup>1</sup>, Olga  
6 Dmitrievna Kotsareva<sup>1</sup>, Anton Andreevich Sergeev<sup>1</sup>, Elena Victorovna Svrshcehvskaia<sup>1</sup>

7

8 <sup>1</sup> Laboratory of Cell Interactions, Shemyakin-Ovchinnikov Institute of Bioorganic Chemistry,  
9 Moscow, Russian Federation

10 <sup>2</sup> Sechenov First Moscow State Medical University, Moscow, Russian Federation.

11

12 \* - corresponding author

13 e-mail: [boris-chudakov@yandex.ru](mailto:boris-chudakov@yandex.ru)

14

15

16

17

18

19

20 **The IgE production is initially induced in subcutaneous fat and depends on**  
21 **extrafollicular B cells**

22 Short title: Extrafollicular IgE response in subcutaneous fat

23 **Chudakov D.B., Fattakhova G.V., Konovalova M.V., Tsaregorosteva D.S.,**  
24 **Shevchenko M.A., Kotsareva O.D., Sergeev A.A., Svirshchevskaya E.V.**

25 Laboratory of Cell Interactions, Shemyakin-Ovchinnikov Institute of Bioorganic Chemistry,  
26 RAS

27 **Abstract**

28 **Background.** Growing body of evidence indicates that IgE production can be developed by  
29 mechanisms that differ from those responsible for IgG and IgA production. One potential  
30 possibility is generation of IgE producing cells from tissue-associated B-cells and/or through  
31 extrafollicular pathway. But the role of subcutaneous fat-associated B-cells in this process is  
32 poorly investigated. The aim of the present study was to investigate the role of different B- and T-  
33 cell subpopulations after long-term antigen administration in IgE response.

34 **Methods.** BALB/c mice were immunized 3 times a weeks for 4 weeks in withers region enriched  
35 with subcutaneous fat with high and low antigen doses as well as by intraperitoneal route in region  
36 enriched with visceral fat for comparison.

37 **Results.** After long-term antigen administration that promotes the type of immune response which  
38 is more similar to one observed in young allergic children, subcutaneous fat tissue B-cells  
39 generates more rapid and active IgE class switched and IgE-produced cells. Although IgE  
40 production at later time points was initiated also in regional lymph nodes, the early IgE production  
41 was exclusively linked with subcutaneous fat. We observed that low-dose induced strong IgE  
42 production accompanied by minimal IgG1 production was linked with extrafollicular B-2 derived

43 plasmablasts as well as extrafollicular T- helpers accumulation. Delayed IgE class switching in  
44 regional lymph nodes and visceral fat tissue was characterized by the absence of both stable  
45 plasmablasts and T-extrafollicular helpers accumulation.

46 **Conclusion.** Extrafollicular B- and T-cell responses in subcutaneous fat are necessary for early  
47 IgE class switching and sensitization process in the case of allergen penetration through skin.

48 **Key words: IgE; Extrafollicular response; subcutaneous fat; plasmablasts; T-extrafollicular**  
49 **helpers.**

50

51

52

53

54

55

56

57

58

59

60

61

62

63

64

65

66

67

## 68 **Introduction**

69           It is generally accepted that the predisposition to development of allergic immune response  
70 in individuals depends on their barrier tissue properties, including lymphoid structures located in  
71 the vicinity to these barrier tissues. For example, polymorphisms of *FLG* gene encoding filaggrin  
72 protein associated with skin barrier function as well as in *IL33* and *TSLP* genes encoding cytokines  
73 upregulated in response to barrier tissue damage are linked with atopic dermatitis development  
74 [1]. Some genetic variants of claudin-1 gene and different expression levels of claudin-18 gene is  
75 linked with atopic dermatitis and asthma development, respectively [2, 3]. These features in gene  
76 structure and/or expression levels may be responsible for poor tight junctions formation and for  
77 predisposition to barrier tissues damage [1] which, in turn, leads to production of type 2 response  
78 inducing cytokines and subsequent T-helper cell polarization and IgE production [4]. Nowadays  
79 the important role of local tissue-associated tertiary lymphoid structures in initial studies of allergic  
80 immune response development becomes more evident. From clinical studies of nasal polyps in  
81 patients with allergic rhinitis [5; 6], as well as some experimental mouse asthma models [7-9], it  
82 becomes clear that mucosal-associated B-cells could be activated to class switch recombination *in*  
83 *situ*, in nasal polyps or inducible bronchial-associated lymphoid tissue (iBALT). It is also  
84 interesting that at least at some conditions this process can be dependent more strikingly from  
85 extrafollicular B-cell activation and requires minimal GC response [10].

86           Although allergens could penetrate not only via airway epithelium but also through skin  
87 epithelium with subcutaneous adipose tissue, the role of fat-associated lymphoid clusters (FALCs)  
88 or at least fat-associated B-cells in the initial studies of allergic immune response is not well  
89 studied in comparison to the role of nasal polyps and iBALT. Although it is believed that in  
90 subcutaneous fat the number of FALCs is more lower than in abdominal fat or epicardium [11]  
91 and that visceral fat-associated B-cells are linked with chronic inflammation for example during  
92 the development of insulin resistance [12], the other studies indicate that subcutaneous fat,

93 especially in obese individuals, contains immunologically active B- and T-cells [13; 14]. It is  
94 important to mention that obesity is one of the lifestyle factors linked with asthma development  
95 [15] and administration of pro-adipogenic leptin enhances IgE production and asthma  
96 development in mice [16] while administration of anti-adipogenic adiponectin inhibited it [17].  
97 These facts indicate that subcutaneous fat tissue is mainly linked with obesity, and fat-associated  
98 B-cells can be responsible for initiation of pro-allergic immune response especially when low  
99 antigen doses penetrates skin barrier to enter the internal environment of the body.

100 We and others [18-20] have shown that specific IgE production in allergic patients is not  
101 linked with specific IgG1 or IgG4 production at least in the case of non-replicative allergens. This  
102 fact indicates that specific IgE production is induced by mechanism different from that responsible  
103 for IgG production. It is well known that high IgG response requires strong GC induction, mostly  
104 in secondary lymphoid organs. So, one could suppose that IgE production is triggered in the site  
105 different from secondary lymphoid organ B-cell follicles and without significant GC induction.

106 In most currently used allergic models, high doses of antigens are administrated to mice  
107 together with adjuvants [21-23] which induced robust GC formation. In contrast, adjuvant-free  
108 low antigen doses models can establish significant pro-anaphylactic IgE-based immune response  
109 [24-26] and that low-dose IgE inducing strategy better reflects the natural sensitization process  
110 [27]. In our previously work, we have shown that low rather than high, chronically administrated  
111 antigen doses induce significant IgE response with minimal IgG production [28]. In addition, we  
112 have shown that the route of antigen administration has significant effect on the intensity of  
113 specific IgE production. Administration of OVA as a model antigen in withers adipose tissue by  
114 subcutaneous route which resembles antigen penetration through damaged skin and entering into  
115 the subcutaneous fat induced B-cell IgE isotype switching in adipose tissue but not in regional  
116 lymph nodes. It should be mentioned that withers region in mice contains the most developed  
117 subcutaneous fat structures [29]. In the same time, administration of antigen by intraperitoneal  
118 route in the region enriched in visceral fat that, however, is not linked with barrier tissues, directly

119 induces weak, if any, specific IgE production [28]. The mechanisms which mediate participation  
120 of B and T-cell populations in such response, as well as more delayed IgE class switching in  
121 regional lymph nodes and abdominal fat tissues are not fully understood.

122 In many allergic and asthma models, B-cell and T-cell subpopulations were thoroughly  
123 studied. But most authors focused on late phases of allergy immune response which are  
124 characterized by intensive manifestations of asthma or allergy symptoms and develop several days  
125 after intensive challenge starting [30]. This approach, however, provides little information on early  
126 stages of allergy development observed in children [20] before development of atopic march in  
127 later years [31], and compensatory IgG production [32] obviously related to classical GC response  
128 in some individuals. So, in this work, we focus on investigation of early stages of allergen-specific  
129 immune response.

130 The aim of the present work is to estimate B-cell subpopulations responsible for early IgE  
131 B-cell class switching in subcutaneous fat in comparison to regional lymph nodes, role of certain  
132 T-cell subpopulations, as well as to understand potential mechanisms of IgE class switching  
133 hampering in regional lymph nodes and abdominal fat tissue. Deeper understanding of these  
134 mechanisms will help to improve current strategies for allergy and asthma prevention in  
135 predisposed individuals.

136

137

138

139

140

141

142

143

## 144 **Materials and methods**

### 145 **Mice**

146 All animal experiment protocols were carried out by IBCh RAS IACUUC protocol. Female  
147 BALB/c mice (6-8 weeks) were obtained from Andreevka Center (Stolbovaya, Russian  
148 Federation). Mice were housed 2 weeks in SPF condition before each experiment. During this time  
149 as well as experimental protocol animals were kept in 12-h light-dark cycle at room temperature  
150 in plastic cages (10-12 mice per cage). Mice were fed *ad libitum*.

### 151 **Immunization, allergen challenge and sample collection**

152 Mice received OVA (Sigma Aldrich, Darmstadt, Germany) as a model antigen 3 times a  
153 week for 4 weeks (28 days) (Figure S1). OVA was administered by subcutaneous route (s.c.) in  
154 withers region (W) in low (100 ng) or high (10 µg) dose or by intraperitoneal route (i.p.) in low  
155 dose. Antigen was administered in sterilized saline solution in 100 µl volume. Intact mice or  
156 saline-treated animals were used as control groups. There were 20 mice in each experimental  
157 group. Every 7 days 5 mice from each three experimental group were challenged with 0.2 ml of  
158 0.25% OVA solution to estimate anaphylaxis severity. Body temperature was measured by  
159 infrared thermometer CEM DT-8806S (SEM Test Instruments, Moscow, Russia) as it was  
160 performed in [33]. The temperature was measured every 15 minutes for 1.5 hour. We observed  
161 that the most significant temperature decline was detected after 45 minutes, and the magnitude of  
162 this decline was considered as a quantitative indicator of anaphylaxis severity. The magnitude of  
163 this decline is always was not higher than 2.5 °C in the case of animal survival. In some cases,  
164 however, we observed animals' death after 30-60 minutes upon challenge. In lethal cases,  
165 anaphylaxis severity is believed to be higher than in survival cases, and the earlier death means  
166 the higher severity. Therefore, we assigned the value of  $-dT \llcorner 3 \llcorner$  to death time point 1 hr, value  
167  $\llcorner 4 \llcorner$  to death time point 45 minutes, and value  $\llcorner 5 \llcorner$  to death time point 30 minutes after upon  
168 challenge.

169 After systematic anaphylaxis intensity measurement, mice were bled. The blood was taken  
170 by retroorbital technique from living anesthetized animals and by cardiac puncture *post mortem*.  
171 Serums were collected by centrifugation and store at -20°C. Mice were sacrificed by isoflurane  
172 («Aeran», Baxter) inhalation and perfusion through retroorbital sinus was performed. Withers  
173 adipose tissue samples or abdominal adipose tissue and regional lymph nodes were collected. For  
174 quantitative PCR samples from adipose tissue were homogenized in ExtractRNA (Evrogen) which  
175 is Trizol analog. For flow cytometry homogenization was performed in PBS pH=7.2.  
176 Homogenates were than centrifugeted (300 g) and washed 2 times with PBS. Regional lymph  
177 nodes were initially homogenized in PBS following centrifugation.  $5 \cdot 10^5$  cells were taken from  
178 suspension, pelleted and resuspended in ExtractRNA for gene expression levels measurement. The  
179 remaining cells were taken for flow cytometry.

#### 180 **ELISA for OVA specific antibody assay**

181 ELISA for detection of specific IgE production was carried out on 96-well microtitre plates  
182 (Costar, Maxisorb) coated with 50 µl of 20 µg/ml OVA solution in PBS pH=7.2 overnight at +4°C.  
183 After extensive washing with PBS with 0.05% Tween-20 (PBS-T) and subsequent blocking with  
184 5% BSA in PBS, incubation with different serum dilutions was performed at +4°C overnight.  
185 Incubation with with anti-mouse IgE - HRP (clone 23G3, Abcam, 1:1000 dilution, 3 hrs) was  
186 performed next day. Plates was further processed with 3,3',5,5'-tetramethylbenzidine (TMB)  
187 substrate. Optical densities (ODs) were measured by automatic plate reader (Thermo Fisher  
188 Scientific, Waltham, MA, USA) at 450 nm with subtraction of optical density at 620 nm which  
189 does not correspond to the reaction colored product. Antibody quantities were estimated as serum  
190 titers corresponded to the maximal serum dilutions where OD was three standard deviations higher  
191 than mean background OD.

192 The ELISA protocol for specific IgG1 production was slightly modified. Coating was  
193 performed by 5 µg/ml OVA solution in PBS pH=7.2. Blocking was performed by 1% BSA in PBS.



194 Following serum samples incubation, plates were further processed with anti-mouse IgG1 (clone  
195 RMG1-1, BioLegend) in 1:1000 dilution for 2 hours.

### 196 **Gene expression measurement**

197 RNA was extracted by phenol-chloroform extraction method followed by RNase free  
198 DNase treatment (Thermo Fisher Scientific, USA). For measurement of DNA excision circles  
199 corresponding to direct and sequential IgE switch, we did not perform DNA digestion. cDNA was  
200 synthesized by using RevertAid First Strand cDNA Synthesis Kit (Thermo Fisher Scientific).  
201 Quantitative PCR was performed with kits from BioLabMix (Novosibirsk, Russia). Probes with  
202 6-FAM as a fluorescent dye on 5'-end and BHQ-1 as a quencher on 3'-end were used. Expression  
203 of target genes and presence of excision DNA circles was estimated by normalizing to expression  
204 of 2 house-keeping genes, GAPDH and HPRT, and was calculated as  $2^{-d(dCt)}$  in comparison  
205 with expression in the tissues of intact control mouse. Reaction was performed in CFX Connect  
206 Amplificator (BioRad) according to the following protocol: +95°C initial denaturation for 3  
207 minutes followed by 50 cycles: 5 s denaturation at +95°C; 20 s annealing and elongation at +64°C.  
208 Reaction was performed in 96-well plates (MLP9601, BioRad) in 20  $\mu$ l volume. Forward and  
209 reverse primer concentrations were 0.4  $\mu$ M each, and probe concentration was 0,2  $\mu$ M. Primers  
210 and probes were designed in NIH Primer BLAST and synthesis was performed by Evrogen  
211 (Moscow, Russian Federation).

212 The following primers and probes were used:

213 GAPDH:

214 F: GGAGAGTGTTTCCTCGTCCC; R: ACTGTGCCGTTGAATTTGCC; Z: /6-FAM/  
215 CGCCTGGTCACCAGGGCTGCCATTTGCAGT-/BHQ-1/; product length 202 b.p.

216 HPRT:

217 F: CAGTCCCAGCGTCGTGATTA; R: TCCAGCAGGTCAGCAAAGAA; Z: /6-FAM/  
218 TGGGAGGCCATCACATTGTGGCCCTCTGTGTG /BHQ-1/; product length 228 b.p.

219 germline  $\epsilon$   
220 F: CCCACTTTTAGCTGAGGGCA; R: CTGGTTAAGGGCAGCTGTGA; Z: /6-FAM/  
221 CGCCTGGGAGCCTGCACAGGGGGC-/BHQ-1/; product length 244 b.p.  
222 circular  $\mu$ - $\epsilon$   
223 F: CCCACTTTTAGCTGAGGGCA; R: CGAGGGGGAAGACATTTGGG; Z: /6-FAM/  
224 CGCCTGGGAGCCTGCACAGGGGGC-/BHQ-1/; product length 203 b.p.  
225 circular  $\gamma$ 1- $\epsilon$   
226 F: AGATTCACAACGCCTGGGAG; R: GTCACTGTCACTGGCTCAGG; Z: /6-FAM/  
227 CCACTGGCCCCTGGATCTGCTGCCCA-/BHQ-1/; product length 211 b.p.  
228 germline  $\gamma$ 1  
229 F: AGAACCAAGGAAGCTGAGCC; R: AGTTTGGGCAGCAGATCCAG; Z: /6-FAM/  
230 AGGGGAGTGGGCGGGGAGGCCA-/BHQ-1/; product length 109 b.p.

231

## 232 **Flow cytometry**

233 Cells from adipose tissue and lymph node homogenates were passed through 80  $\mu$ m mesh  
234 filter to obtain single cell population. Cells were washed in PBS and stained with antibodies to  
235 respective markers. To discriminate B-cell subpopulations antibodies were used as follows: CD5-  
236 BV510 (clone 53-7.3, BioLegend), CD1d-FITC (clone 1B1, BioLegend), CD95-PE (clone  
237 SA367H8, BioLegend), CD38-PECy7 (clone 90, BioLegend), CD19-APC (clone 6D5,  
238 BioLegend), B220-APCCy7 (clone RA3-6B2, BioLegend). To discriminate ILC2, NK-cells and  
239 T-cells subpopulations organs homogenates were stained: CD4-BV510 (clone GK1.5,  
240 BioLegend), CD49b-PE (clone HMa2, BioLegend), CXCR4-PerCPCy5.5 (clone L276F12,  
241 BioLegend), CXCR5-PECy7 (clone L138D7, BioLegend), ST2-APC (clone DIH4, BioLegend),  
242 CD45-APCCy7 (clone 30F11, BioLegend), biotinylated anti-lineage cocktail (Biolegend, cat #  
243 133307) followed by streptavidin-FITC (Biolegend). For isotype control we used anti-rat IgG1

244 antibodies (clone GO114F17) labeled with BV510, FITC, PE, PerCPCy5.5, PECy7, APC and  
245 APCCy7 respectively.

246 After pre-blocking with 10% of rabbit serum for 15 minutes cells were stained for 1 hour  
247 at +4°C in FACS buffer (0,5% BSA, 0,01% NaN<sub>3</sub> in PBS pH=7.2). To exclude death cells DAPI  
248 was added prior to flow cytometry.

249 B-1a cells were identified as CD19<sup>+</sup>B220<sup>+</sup>CD5<sup>+</sup> [34], MZ-B cells as CD19<sup>+</sup>B220<sup>+</sup>CD1d<sup>+</sup>  
250 [34], GCs as CD19<sup>+</sup>B220<sup>+</sup>CD38<sup>-</sup>CD95<sup>+</sup> [35], extrafollicular plasmablasts as CD19<sup>+</sup>B220<sup>-</sup> [36].  
251 Different expression of CD38 and CD95 allows to discriminate these populations. ILC2 were  
252 identified as CD45<sup>+</sup>Lin<sup>-</sup>ST2<sup>+</sup> cells [37], NK-cells as CD45<sup>+</sup>CD49b<sup>+</sup>, T-follicular helpers as  
253 CD45<sup>+</sup>Lin<sup>+</sup>CD4<sup>+</sup>CXCR4<sup>+</sup>CXCR5<sup>+</sup>, extrafollicular T- helpers as  
254 CD45<sup>+</sup>Lin<sup>+</sup>CD4<sup>+</sup>CXCR4<sup>+</sup>CXCR5<sup>-</sup> based on the observations from [38], Th-2 as  
255 CD45<sup>+</sup>Lin<sup>+</sup>CD4<sup>+</sup>CXCR4<sup>-</sup>CXCR5<sup>-</sup>ST2<sup>+</sup> cells [39].

256 For intracellular IgE staining cells were also pre-blocked with anti-mouse IgE (RME-1,  
257 BioLegend) in 1:50 final dilution for 30 minutes. After staining for surface markers, they were  
258 fixed in 4% PFA for 20 minutes and permeabilized in 0.1% Triton-X100. During permeabilization  
259 step, anti-mouse IgE-FITC (RME-1) was added.

260 Flow cytometry was performed on MACSQuant Tyto (Miltenyi Biotech, Germany).  
261 Results were processed in FlowJo V10 (BD, USA).

262

### 263 **Histology with H&E staining**

264 Lung tissue samples with the lower part of trachea were taken from isoflurane sacrificed  
265 mice. Lungs were immediately filled with 4% PFA through a cannula inserted into the trachea.  
266 Lungs were kept in 4% PFA before histological sections preparation. Histological sections 8 nm  
267 thick were made on microtome (???). H&E staining was performed with Hematoxylin and Eosin  
268 staining kit (Abcam, Cat # ab245880), according to manufacturer instructions.

269

270           **Statistics**

271           All experiments were performed 2-3 times. For comparison of experimental groups, Mann-  
272   Whitney non-parametric test was used. Levels of  $p < 0.05$  were considered statistically significant.  
273   For correlation coefficients determination, Spearman test was used. Mean and standard deviations  
274   for each compared group were calculated.

275

276

277

278

279

280

281

282

283

284

285

286

287

288

289

290

291

292

## 293 **Results**

### 294 **Chronically low dose antigen administration in subcutaneous but not abdominal fat** 295 **tissue induces early B-cell IgE class switching and reproduces IgE-mediated type I** 296 **hypersensitivity**

297 We have previously shown [28] that long-term antigen administration induces high specific  
298 IgE titres mainly when antigen administrated in withers region by s.c. route. Indeed, we observed  
299 that low (100 ng) dose of OVA induced substantial IgE response from 14<sup>th</sup> day of immunization  
300 protocol. This response reached a plateau on 21<sup>th</sup> day, as well as specific IgG1 response, when  
301 mice developed pro-anaphylactic immune response according to existence of significant  
302 temperature drop after high dose allergen challenge (Fig. 1A-C). It is interesting that in these  
303 experiment series we also observed specific IgE production in high (10 µg) dose immunized  
304 animals which was comparable to specific IgE production in low dose group to 28<sup>th</sup> day (Fig. 1G).  
305 It should be mentioned that this production reached such level only at 28<sup>th</sup> day and, that is more  
306 important, was accompanied by very high specific IgG<sub>1</sub> production (Figure 1 D-F, H). Although  
307 anaphylactic severity in high dose immunized animals was higher than in low dose immunized  
308 mice (Fig. 1I) and allergen challenge provoked high mortality in high dose group, we did not  
309 observe significant correlation between IgE production and this anaphylactic severity (Fig. 1K).  
310 So, in this case anaphylaxis could be due to presence of pro-anaphylactic IgG1 antibodies which  
311 could trigger in some cases mast cell degranulation [40] or platelet activation factor release from  
312 macrophages [41]. Both pathways are not developed during classical human type I allergy  
313 response [42]. In contrast, we observed significant correlation between IgE production and  
314 anaphylaxis severity in low dose group (Fig. 1J). So, chronical administration of low antigen doses  
315 is characterized by high allergen specific IgE and low IgG levels, and significant dependence of  
316 anaphylaxis on specific IgE levels. Therefore, this model better reproduces clinical pathogenesis  
317 of sensitization and IgE – mediated type I allergy development in humans.

318           **Subcutaneous fat-associated B-cells are responsible for early B-cell IgE class**  
319 **switching**

320           We next addressed the question if B-cell IgE class switching occurs exclusively in  
321 subcutaneous tissue associated B-cells and if these B-cells form FALCs. In our previously work  
322 [28], we have shown that B-cell IgE isotype switching, but not IgE production, was triggered in  
323 tissue associated B-cells. In this study, we used more accurate method of gene expression  
324 quantification, namely, probe based quantitative PCR instead of SybrGreen I based technique.  
325 Indeed, in accordance with our previous results, we showed that at early time points from 7<sup>th</sup> to  
326 21<sup>th</sup> day of immunization induction of markers linked with isotype switching occurred almost  
327 exclusively in withers adipose tissue. Meanwhile the circular  $\mu$ - $\epsilon$  DNA excision circles were  
328 detected in lymph nodes of high dose and low dose mice group on 14<sup>th</sup> day and 21<sup>th</sup> day  
329 respectively (Fig. 2A-B). As far as these excision circles could originate from B-cells that had  
330 recently migrated to lymph nodes from the site of isotype switching, it is more likely that during  
331 the first 3 weeks of chronic antigen administration B-cell IgE isotype switching occurred  
332 exclusively in subcutaneous fat-associated B-cells. These data were confirmed by flow cytometry  
333 of IgE<sup>+</sup> B-cells quantification (Fig. 2C-D). We clearly discriminated two IgE<sup>+</sup> B-cells  
334 subpopulations, namely, IgE<sup>low</sup> and IgE<sup>high</sup> B-cells (Fig. 2C). But despite this fact, the percentage  
335 of both IgE<sup>+</sup> B-cell subpopulations increased firstly in adipose tissue (21<sup>th</sup> day) and only secondly  
336 in lymph nodes (28<sup>th</sup> day) (Fig. 2D). However, in contrast to our previous results [28], we observed  
337 expression of markers associated with B-cell IgE class switching also in regional lymph nodes  
338 after 4 weeks of antigen administration (Fig. 2A-D). It can indicate that after long time, even low  
339 antigen doses could accumulate in sufficient quantity not only in the sites of antigen administration  
340 but also in regional lymph nodes. According to another possibility, the antigen reached the lymph  
341 nodes during the first week of administration, but certain specific yet unidentified niche factors  
342 suppressed early B cell IgE switching in SLOs.

343 To investigate the relative contribution of  $IgE^{low}$  and  $IgE^{high}$  B-cells from tissue and lymph  
344 nodes in IgE production, we verified the presence of correlations between IgE production and  
345 percentage of these cells in tissue or lymph node respectively. Surprisingly, we have found that  
346 the quantity of  $IgE^{low}$ , but not  $IgE^{high}$ , B-cells is linked with specific IgE production. Despite that  
347 initial IgE class switching occurred in the site of antigen administration in tissue, the lymph node  
348 B-cells also participated in IgE production (Fig. 2E). There were no significant correlations  
349 between IgE production and quantity of  $IgE^{high}$  B-cells either in tissue or lymph nodes (Fig. S2).  
350 One could suppose that there are at least two pathways of  $IgE^{+}$  cells generation in our model. The  
351 first one leads to generation of B-cells which express high  $IgE^{+}$  BCR levels but do not differentiate  
352 effectively in  $IgE^{+}$  plasma cells. The second pathway leads to generation of B-cell express low  
353 levels of  $IgE^{+}$  BCR but rapidly differentiate into  $IgE^{+}$  plasma cells.

354 Two types of DNA excision circles corresponding to direct ( $\mu$ - $\epsilon$ ) or sequential ( $\gamma$ 1- $\epsilon$ ) IgE  
355 isotype switch appeared in our model. The excision circles corresponding to direct switch  
356 appeared, in general, earlier in both withers tissue and lymph nodes (Fig. 2A-B). We also have  
357 shown that quantity of  $IgE^{low}$  B-cells (but not  $IgE^{high}$ ) correlated with germline  $\epsilon$  transcript  
358 expression and appearance of  $\mu$ - $\epsilon$  DNA excision circle (Fig. S3). So, it is more likely that early  
359 IgE production is dependent on direct IgE switch from IgM to IgE which is consistent with our  
360 previous data obtained from young allergic patients [20].

361 It is well known that visceral adipose tissue contains a large number of FALCs [12]. FALCs  
362 resembling structures were found in human subcutaneous adipose tissue [13]. In present study to  
363 visualize these structures, we performed H&E histological staining of subcutaneous fat from  
364 withers region. Fig. S4 clearly shows that some fat-associated B-cells formed FALCs- like  
365 structures of different sizes, the others tended to form small dense or large diffuse infiltrates  
366 between adipocytes. Apparently these infiltrates could later develop to FALCs. This fact may  
367 indicate that FALCs in subcutaneous fat are very dynamic structures. This hypothesis is indirectly

368 proven by different FALCs sizes as well as by communication of larger FALCs with lymphatic  
369 vessels (Fig. S5).

370

371 **IgG1 class switching occurs simultaneously both in subcutaneous fat-associated B-**  
372 **cells and lymph node B-cells.**

373 In contrast to IgE, IgG1 class switching was initiated simultaneously both in subcutaneous  
374 adipose tissue and regional lymph nodes (Fig. 3A) as characterized by germline  $\gamma 1$  expression. It  
375 is interesting that its expression was upregulated only at 21<sup>th</sup> day at low dose group and at 28<sup>th</sup> day  
376 at high dose group while IgG1 production appeared after 2 weeks of antigen administration.  
377 Apparently, low levels of B cells' co-stimulation by T cells and germline transcript induction,  
378 which was undetectable in bulk tissue sample, were sufficient for IgG1 class switch, in contrast to  
379 IgE [43]. Indeed IgG1<sup>+</sup> B-cells accumulation could be detected in both adipose tissue lymphocyte  
380 pool and in regional lymph nodes (Fig. 3B-C). However, only lymph node IgG1<sup>+</sup> B-cell quantity  
381 correlated with specific IgG1 production (Fig. 3D). So, IgG1<sup>+</sup> production induced by low dose  
382 antigen administration occurred mainly in regional lymph nodes.

383 **IgE<sup>low</sup> B-cells acquire extrafollicular phenotype compared to IgE<sup>high</sup> and IgG1<sup>+</sup> B-cells**

384 The tendency of IgE<sup>low</sup> B cells to develop into plasma cells more rapidly may be explained  
385 by the localization attachment of IgE low and IgE high populations within to different B cell  
386 compartments and undergoing separate differentiation pathways.. To investigate this possibility,  
387 we performed phenotype analysis of these cell subpopulations using B-cell markers which are  
388 differently expressed on naïve B-cells, GCs and plasmablasts – B220, CD38 and CD95. IgG1<sup>+</sup>  
389 cells and total B-cell fraction were analyzed for comparison. Fig. 4 shows that at the beginning of  
390 IgE production (14<sup>th</sup> day) all three B cell subpopulations with switched Ig isotype expressed  
391 significant levels of B220, though its expression on IgE<sup>low</sup> cells was weaker compared to IgG1<sup>+</sup>  
392 cells. Both IgE<sup>low</sup> and IgE<sup>high</sup> B-cells, in contrast to IgG1<sup>+</sup> populations, were CD95 negative. Since  
393 B220 is a major B-2 cells marker except plasmablasts [34, 36], high levels of CD38 and CD95



394 indicates naïve and GC forming activated B-cells, respectively [35, 44] our data suggest that IgG1<sup>+</sup>  
395 B-cells isotype switching, compared to IgE switching, occurs in cells that are more predisposed to  
396 GC formation.

397         However, at final time point (4 weeks, 28<sup>th</sup> day) the expression of B220 was significantly  
398 decreased in all switched B-cell subpopulations IgE<sup>low</sup> and IgE<sup>high</sup> B-cells were completely  
399 negative, while IgG1<sup>+</sup> cells still remained B220 positive in relevance to appropriate isotype control  
400 staining. Both IgE<sup>low</sup> and IgE<sup>high</sup> B-cells acquired substantial CD95 expression but IgE<sup>high</sup> B-cells  
401 became almost all CD95 positive, whereas significant fraction of IgE<sup>low</sup> cells remained CD95  
402 negative. Mean expression of CD38 tended to increase in all subpopulations. But in the case of  
403 IgE<sup>high</sup> and, to lesser extent, IgG1<sup>+</sup> populations, there was significant fraction of cells with low to  
404 negative expression of CD38 (Fig. 4). These facts indicate that IgE<sup>low</sup> B-cells, in contrast to IgE<sup>high</sup>  
405 and IgG1<sup>+</sup>, tended more to develop into extrafollicular B-cell plasmablasts. As far as IgE<sup>+</sup> cells are  
406 committed to programmed cell death due to high pro-apoptotic potential in GCs [45], the pathway  
407 which led to plasmablasts formation could support IgE response more actively than conventional  
408 activation which led to GC formation. We presume that separate B cell compartments were  
409 differentiated by similar though slightly different pathways and these discrepancies could be linked  
410 to different capacity to develop into CD19<sup>+</sup>B220<sup>-/low</sup> plasmablast compartment Different rate of  
411 plasmablasts accumulation could results in different rate and intensity of IgE class switching in  
412 subcutaneous adipose tissue compared to regional lymph nodes.

413         **B-2 cell derived plasmablasts but not GCs are responsible for IgE production after**  
414 **long-term antigen administration**

415         To verify this hypothesis, we performed flow cytometry analysis of B-cell subpopulations  
416 isolated from withers and regional lymph nodes at different time points during long-term antigen  
417 administration protocol in subcutaneous adipose tissue.

418         B-cell gating strategy is shown on Fig. S5. Fig. 5 clearly shows that there was no GCs  
419 (CD19<sup>+</sup>B220<sup>+</sup>CD38<sup>-</sup>CD95<sup>+</sup>) induction either in subcutaneous withers adipose tissue or in regional

420 lymph nodes. Although high doses of antigen induced GC B-cell accumulation, in subcutaneous  
421 fat this induction was transient and was detected only at 21<sup>th</sup> day, which indicate that conditions  
422 for GC persistence in subcutaneous fat were unfavorable, and in regional lymph nodes this  
423 induction was detected only at 28<sup>th</sup> day. Instead, significant accumulation of CD19<sup>+</sup>B220<sup>-</sup>  
424 plasmablasts was observed. Most of these plasmablasts were CD19<sup>+</sup>B220<sup>-</sup>CD38<sup>-</sup>CD95<sup>+</sup> (Fig. 5C-  
425 D) and the amount of these cells in subcutaneous fat or lymph nodes directly correlated with  
426 specific IgE production (Fig. 5C, E). The absence of CD38 and presence of CD95 may indicate  
427 that these cells are closely relative to classical GCs differing from that only by the absence of B220  
428 expression. The other possibility is that this phenotype could simply reflect full activated B-cell  
429 state.

430 The other plasmablasts subpopulations also accumulated in adipose tissue and regional  
431 lymph nodes and the earlier subpopulation in adipose tissue apparently represents B220<sup>-</sup>  
432 CD38<sup>+</sup>CD95<sup>-</sup> resembles naïve B-cells (Fig. S6A-B). It is likely that these cells later differentiate  
433 into other plasmablast subpopulations. The percentage of all of these subpopulations in CD19<sup>+</sup> B-  
434 cells, however, did not significantly correlate with IgE production with exception of CD19<sup>+</sup>B220<sup>-</sup>  
435 CD38<sup>+</sup>CD95<sup>+</sup> and CD19<sup>+</sup>B220<sup>-</sup>CD38<sup>-</sup>CD95<sup>-</sup> cells in regional lymph nodes (Fig. S6C-D). As  
436 shown above, IgE switched B-cells acquired CD95 and CD38 expression over time and lost B220  
437 expression. So, it is likely that after IgE class switching CD19<sup>+</sup>B220<sup>-</sup>CD38<sup>+</sup>CD95<sup>+</sup> cells could  
438 differentiate from CD19<sup>+</sup>B220<sup>-</sup>CD38<sup>-</sup>CD95<sup>+</sup> cells and CD19<sup>+</sup>B220<sup>-</sup>CD38<sup>-</sup>CD95<sup>-</sup> from  
439 CD19<sup>+</sup>B220<sup>+</sup>CD38<sup>-</sup>CD95<sup>-</sup>, respectively. It is also interesting, that at early time points we could  
440 not detect significant differences in accumulation among various plasmablasts subpopulations,  
441 except CD19<sup>+</sup>B220<sup>-</sup>CD38<sup>+</sup>CD95<sup>-</sup> in lymph nodes, in low and high dose immunized mice.

442 The percentage of GC B-cells in withers adipose tissue inversely correlated with specific  
443 IgE production. There was no functional association between the number GC B-cells in local  
444 lymph nodes and IgE levels (Fig. S7). As seen in gating strategy plots (Fig. S5), these plasmablasts  
445 subpopulations were not derived from B-1a or MZ-B B-cells. In comparison to B-2 derived

446 plasmablasts no increase in B-1a or MZ-B B-cells was detected before day 21 upon immunization.  
447 Only at later time points there was transient increase in amount of B-1a B-cells (Fig. S8). However,  
448 this increase did not correlate with IgE production (data not shown).

449 In addition, we observed that the percentage of different plasmablasts subpopulations in  
450 regional lymph nodes and withers tissue started to increase at the same time points. It means that  
451 antigen even at low doses is rapidly delivered in regional lymph nodes. So, one can suppose that  
452 extrafollicular plasmablasts accumulation *per se* is necessary but not sufficient for IgE production,  
453 and the impact of different types of T-helpers on these cells in withers adipose tissue and regional  
454 lymph nodes could result in delayed IgE switching in regional lymph nodes.

455

456 **Extrafollicular T-helper cells accumulation results in high IgE production which is**  
457 **accompanied by minimal IgG1 production in response to low antigen doses**

458 Indeed, different effector cytokine-producing cells and T-helper subpopulations could be  
459 responsible for specific humoral response pattern in response to low antigen dose. Different  
460 activity of these cells in withers tissue and regional lymph nodes could account for delayed IgE  
461 isotype switching in regional lymph nodes vs. subcutaneous adipose tissue B-cells.

462 Gating strategy for T-helper cell subsets, NK-cells and ILC2 cells is shown of Fig. S9.  
463 Presuming that extrafollicular proliferating plasmablasts account for specific IgE production, it  
464 is logical that this production is also directly linked with extrafollicular T- helpers which are  
465 specific T-helper cell type supporting extrafollicular plasmablasts [46]. The IgE production is  
466 reciprocally linked with T-follicular helpers which support GC function and suppress the exit of  
467 B-cells from GCs by stimulating Bcl-6 expression [47]. Indeed, we observed remarkable decrease  
468 of CXCR4<sup>+</sup>CXCR5<sup>+</sup> GC T-follicular helpers and CXCR4<sup>+</sup>CXCR5<sup>+</sup> CD4<sup>+</sup> T-helpers in  
469 subcutaneous fat tissue on 21<sup>th</sup> day when IgE response had reached plateau. We suggest that  
470 CXCR4<sup>+</sup>CXCR5<sup>+</sup>CD4<sup>+</sup> cells could be T-helpers that resided in B-cell follicles outside of GCs and  
471 these cells could also support B-follicle structure [38]. Decreasing of these T-helper cells

472 subpopulations could account for GCs and B-cell follicles destabilization and competitive  
473 enhanced development of extrafollicular plasmablasts (Fig. 6). In contrast, CXCR4<sup>+</sup>CXCR5<sup>-</sup> T-  
474 extrafollicular helpers accumulated in subcutaneous fat tissue though only in low dose immunized  
475 mice and transiently on 21<sup>th</sup> day. There was no accumulation of these cells in regional lymph  
476 nodes, whereas CXCR4<sup>-</sup>CXCR5<sup>+</sup> T-helpers that support B-cell follicles accumulated  
477 significantly, particularly, in high dose group. Accumulation of GC supporting CXCR4<sup>+</sup>CXCR5<sup>+</sup>  
478 T-follicular helpers was also seen in regional lymph nodes at 21<sup>th</sup> day in high dose group (Fig. 6).  
479 So, decreasing of CXCR4<sup>+</sup>CXCR5<sup>+</sup> and CXCR4<sup>-</sup>CXCR5<sup>+</sup> T-helpers activity percentage in CD4<sup>+</sup>  
480 T-cells, which stabilize GCs, and B-cell follicles, respectively, results in accelerated specific IgE  
481 production in subcutaneous fat. CXCR4<sup>+</sup>CXCR5<sup>-</sup> extrafollicular T- helpers accumulation could  
482 support specific IgE but not specific IgG1 production after long-term antigen administration at the  
483 levels compared to high dose immunized mice.

484 It is also interesting that we did not observe significant accumulation of classical T-helper  
485 2 cells (CXCR4<sup>-</sup>CXCR5<sup>-</sup>ST2<sup>+</sup>) which resided mainly in T-cell zone [39] after low dose antigen  
486 administration. Even high antigen doses induce their accumulation only at 28<sup>th</sup> day and mainly in  
487 subcutaneous adipose tissue but not in regional lymph nodes (Fig. S10). These cells could support  
488 later stages of IgE production.

489 ILC2 cells are usually mentioned in context of immune reaction to tissue damage and sterile  
490 inflammation [48]. Although ILC2 showed some tendency to accumulate in subcutaneous fat, they  
491 were too rare and this tendency was insignificant (Fig. S11). Still we observed accumulation of  
492 CD4<sup>-</sup> and CD4<sup>+</sup> NK-cells (CD49b<sup>+</sup>) at the end of immunization in subcutaneous fat of high dose  
493 immunized mice and in regional lymph nodes in both groups (slightly earlier at low dose) (Fig.  
494 S11). Due to their late accumulation in the tissue, these subpopulations could not be associated  
495 with early IgE production.

496

497           **Delayed and hampered IgE and IgG1 B-cell formation in abdominal fat tissue after**  
498 **upon long-term antigen administration is due to unstable induction of extrafollicular B-cell**  
499 **plasmablast accumulation and absence of extrafollicular T-helpers accumulation.**

500           It is well known that abdominal (visceral) fat tissue contains large numbers of FALCs  
501 where local immune response can be initiated [11, 12]. Despite his fact long-term intraperitoneal  
502 antigen administration into the region enriched in visceral fat and associated FALCS established  
503 significant lower and delayed IgE and IgG1 production (Fig. 7 A-E). So, one can conclude that  
504 subcutaneous fat (in our case, in withers region) connected more closely to skin epidermis has  
505 markedly different properties in comparison to visceral abdominal fat which is not connected  
506 directly to skin barrier. The diversity in immune response in both analyzed fat tissues in low dose  
507 model may be functionally associated with differences in subcutaneous and visceral fat-associated  
508 immune cells.

509           To understand the mechanism of this phenomenon, we compared B- and T-cell activation  
510 in subcutaneous and abdominal fat tissues upon antigen administration in low doses model. The  
511 low concentrations of antigen were administered by either subcutaneous injection in withers or  
512 intraperitoneally according to 28 days immunization protocol. First, we wondered if delayed  
513 kinetics of IgE and IgG1 formation in abdominal FALCs could be due to delayed appearance of  
514 IgE<sup>+</sup> and IgG1<sup>+</sup> B-cells. Indeed, we observed that upregulation of germline  $\epsilon$  transcripts in  
515 abdominal fat occurred later than in subcutaneous fat tissue (Fig. S12 A-B). After day 21 of antigen  
516 administration IgE<sup>+</sup> B cells started to accumulate in subcutaneous fat and reach plateau,  
517 presumably, due to rapid differentiation of CD19<sup>+</sup> IgE-producing plasma cells by day 28. The  
518 percentage of IgE<sup>+</sup> cells in abdominal fat was lower, which indicated more delayed kinetics of B  
519 cells accumulation in visceral adipose tissue. (Fig. S12 C-D). The germline  $\gamma 1$  transcripts were  
520 upregulated in both adipose tissues at the same time point. In abdominal fat, their induction was

521 transient and diminished to initial level by 28<sup>th</sup> day (Fig. S12 A-B). IgG1<sup>+</sup> cells accumulated more  
522 rapidly in subcutaneous fat than in abdominal (Fig. S12 D).

523 Delayed IgE and IgG1 production in abdominal fat tissue could be caused by reduced of  
524 extrafollicular B-cell activation in this site compared to subcutaneous fat tissue. Indeed, in  
525 abdominal fat tissue, the accumulation of CD19<sup>+</sup>B220<sup>-</sup>CD38<sup>-</sup>CD95<sup>+</sup> plasmablasts which were  
526 responsible for IgE production in subcutaneous fat, was transient and unstable (Fig. 7 F-G). Such  
527 a weak plasmablasts activation can be explained, firstly, by early burst of Tfh activity in abdominal  
528 fat tissue on day 7 upon of long-term antigen administration, and, secondly by decrease in  
529 extrafollicular Th amount at later time points (3-4 weeks of the immunization) (Fig. 7 G and Fig.  
530 S13). We did not observe significant GC B-cells accumulation in abdominal fat which could be  
531 due to absence of CXCR4-CXCR5<sup>+</sup> T-helpers which function was to stabilize B-cell follicles (Fig.  
532 S14). So, early Tfh burst only could hamper extrafollicular B-cell differentiation instead of  
533 supporting normal GC B-cell development The activity of extrafollicular T-helpers is essential for  
534 stable Ig production by extrafollicular B cell plasmablasts during low dose immunization regime  
535 when low antigen concentrations cannot initiate strong BCR-mediated signaling. We presume that  
536 in the absence of extrafollicular T helpers activity, the accumulation of plasmablasts could be  
537 transient and did not cause strong antibody production.

538 After second week of immunization, CD4<sup>+</sup> NK cells started to accumulate in abdominal  
539 fat. Minor increase in CD4<sup>-</sup> NK-cells was detectable after 7<sup>th</sup> day of immunization (Fig. S15).  
540 CD4<sup>+</sup> NK-cells and its CD1d-restricted variant CD4<sup>+</sup> iNKT cells could activate [49] or inhibit B-  
541 cell Ig production [50] depending on special conditions. The potential inhibitory role of NK cells  
542 is an aim of further studies.

543

544

545

546

## 547 **Discussion**

548 In this study, we found the site of antigen-induced B cell IgE isotype switching in low  
549 doses allergen model (1) and investigated the main patterns of B- and T-cell activation. In our  
550 allergy model, the route of immunization and allergen dose plays essential role in humoral immune  
551 response. Although long term immunization with both low and high antigen doses induced  
552 comparable levels of IgE production, the kinetics of IgE production upon high dose immunization  
553 was slightly delayed and reached plateau only after day 28 of immunization compared to day 21  
554 of immunization with low dose. Moreover, only in low doses administration protocol, anaphylaxis  
555 severity correlated with specific IgE production which resembles clinical manifestations in  
556 humans [20; 51; 52]. Our data are in agreement with previous research reporting that long-term  
557 low dose allergy models better reflect natural sensitization process [24-27]. Both subcutaneous  
558 fat-associated and local lymph node B cells were activated upon long term antigen administration  
559 and produced specific IgE antibodies. Subcutaneous fat was the primary site of antigen-induced  
560 IgE class switching This finding is important for further development of novel approaches of  
561 allergen-specific immunotherapy aiming to prevent IgE class switching and eliminate both local  
562 and systemic IgE-producing B cells.

563 After long-term antigen challenge two IgE<sup>+</sup> B-cells subpopulations were clearly observed  
564 in contrast to IgG1<sup>+</sup> cells. These cells arose from pools of B cells which underwent distinct  
565 differentiation pathways following isotype switching. The first subpopulation, IgE<sup>low</sup> cells, seemed  
566 to be closely linked with IgE production in contrast to other pool, IgE<sup>high</sup> B-cells. In general, IgE<sup>+</sup>  
567 cells more efficiently differentiated into plasmablasts compared to IgG1<sup>+</sup> cells (as judged by loss  
568 of B220 expression). In contrast to IgE<sup>high</sup>, IgE<sup>low</sup> B cells acquire phenotype more distinct from the  
569 phenotype of activated B cells resembling GCs which is characterized by low CD95 and higher  
570 CD38 expression. Although we could not clearly resolve this question we suppose that IgE<sup>low</sup> cells  
571 are more predisposed to develop into plasmoblasts meanwhile IgE<sup>+</sup> cells with GC phenotype are



572 more prone to apoptosis [45] unless they rapidly exit GC and differentiate into antibody producing  
573 cells which do not give rise to stable IgE memory formation [53]. The observed differences in  
574 CD95 expression levels on IgE<sup>low</sup> and IgE<sup>high</sup> cells are of particular interest because of essential  
575 role of CD95 molecule in eliminating self-reactive and IgE<sup>+</sup> cells [54]. Although conventional  
576 plasmablasts are not believed to form GC-like structures, but in present study, we have shown that  
577 some B220<sup>-</sup> plasmablasts acquired GC-like phenotype (CD38<sup>-</sup>CD95<sup>+</sup>) and precisely these cells are  
578 engaged in specific IgE production. Recent research works showed that plasmablasts could also  
579 be regulated by extrafollicular T- helpers, and this regulation is crucial for long-term Ig production  
580 [38, 46]. These Th cells closely interact with extrafollicular B-cells. While CD95 expression on  
581 murine B-cells is induced by CD40 ligation [44], and CD38 expression is inhibited upon T-  
582 dependent GC formation, one can conclude that at certain circumstances extrafollicular B-cells  
583 also acquire GC-like phenotype. Later, immediately before differentiation into Ig producing cells,  
584 these cells, especially IgE<sup>low</sup>, change their phenotype and lose GC-like properties. This can be due  
585 to weaker B-T cell contacts on IgE<sup>low</sup> cells which express low BCR levels and, therefore, cannot  
586 present antigen as efficiently as cells expressing high BCR levels. [55]. Despite that IgE<sup>+</sup> cells  
587 mostly acquired CD38 expression, the closer correlation between IgE production and B220<sup>-</sup>CD38<sup>-</sup>  
588 CD95<sup>+</sup> cells rather than B220 plasmablasts was observed. One possible explanation is low  
589 probability of cognate B-T cell contacts when low doses of antigens are administrated. The stage  
590 when extrafollicular B cells form these contacts and acquire GC-like phenotype is pivotal for the  
591 whole process of IgE-producing cells formation. The relations of IgE production and B220<sup>-</sup>  
592 CD38<sup>+</sup>CD95<sup>+</sup> cells accumulation in lymph nodes were significant and more prominent, in  
593 comparison to that seen in adipose tissue. The lymph nodes possess special stromal cell  
594 architecture which provides the more optimal niche for B cell proliferation and survival compared  
595 to non-lymphoid tissues. It is tempting to assume that B220<sup>-</sup>CD38<sup>+</sup>CD95<sup>+</sup> cells represent the final  
596 stage of IgE<sup>+</sup> cells differentiation into plasma cells before they lose CD19 expression. Further  
597 investigations are needed to clarify this hypothesis.



598           If B220-CD38-CD95<sup>+</sup> plasmablasts are cells that contact with T cells during response to  
599 low antigen doses, it can be assumed that the presence of such Th subpopulation is crucial for  
600 development of IgE response. Indeed, we show here that accumulation of extrafollicular T- helper  
601 cells occurs, first, only in subcutaneous fat tissue where the early, initial IgE class switching is  
602 induced rather than in regional lymph nodes, and, second, only in low dose immunized mice.  
603 Despite being transient and visible only 3 weeks after the start of immunization, this accumulation  
604 is appeared to be critical for maintaining high levels of IgE production. On the contrary, despite  
605 early B cell differentiation into plasmablasts in regional lymph nodes as a result of quick antigen  
606 delivery, IgE class switch was not detected. Moreover, after 3-4 weeks upon antigen administration  
607 into abdominal fat tissue, we observed a decrease in percentage of extrafollicular Th cells. This  
608 seems to be a plausible reason for transitory but not stable B220-CD38-CD95<sup>+</sup> plasmablasts  
609 accumulation in these sites and subsequent delayed IgE and IgG1 production. Besides, in  
610 subcutaneous fat, we observe marked decrease in percentage of Tfh and CXCR4-CXCR5<sup>+</sup> Th in  
611 that occurred simultaneously when accumulation of extrafollicular T- helper and IgE response  
612 reached plateau. In the absence of these subpopulations that support B-cells in GCs [47] and mantle  
613 zone [38], B-cell follicular response can be dropped down and extrafollicular B-cell activation  
614 competitively increases. High antigen doses may cause significant antigen accumulation in either  
615 tissue or lymph nodes which results in elevated signal from BCR which alone could sustain B-cell  
616 proliferation and antibody production, as it was found by some research teams [8, 9]. So just  
617 response to low but not high antigen doses is linked with T-extrafollicular helpers accumulation.

618           The question why these T-cell subpopulations are differently regulated in subcutaneous fat  
619 tissue vs regional lymph nodes and abdominal fat tissue is not yet resolved. Apparently certain  
620 myeloid cells such as DC [56] and macrophages [57, 58] are able to act as regulators of T cells  
621 functions in lymphoid and non lymphoid tissues. However, these particular issues are beyond the  
622 scope of present study and will be addressed in future.

623 In our study, we did not use antibody-based or small molecular inhibitors of GCs. It is not  
624 evident that IgE isotype switching per se occurs in early GC B-cells which emigrate from these  
625 structures soon afterwards. First, in our work, the majority of IgE<sup>+</sup> cells remained CD95<sup>-</sup> CD38<sup>-</sup>  
626 /<sup>low</sup> after beginning of isotype switch which happened 2 weeks after the immunization start. This  
627 means that despite becoming activated these cells did not acquire full GC phenotype. Second, we  
628 did not observe any increase in GC B-cells after low dose antigen administration either in tissue  
629 or in regional lymph nodes and did not detect any positive correlations between these cells'  
630 accumulation and IgE production. Despite that both class switch DNA recombination and somatic  
631 hypermutation occur within GCs [59], several studies suggest that extrafollicular B-cell class  
632 switch recombination is also possible at least at early stages of plasmablasts differentiation [60;  
633 61]. Furthermore, recent work clearly shown that B-cell class switch recombination at least in  
634 some cases occurs mostly in early stages of B-cell activation before differentiation into GC  
635 centroblasts or extrafollicular B-cell blasts and is dependent mostly on T-B cell contacts per se but  
636 not on GC formation. Only somatic hypermutation is linked exclusively with GCs [62]. These  
637 findings support our data showing that 2 weeks after start of immunization the early IgE<sup>+</sup> cells  
638 acquired non-fully activated phenotype characterized by B220<sup>+</sup>CD95<sup>-/low</sup> expression. Later, after  
639 week 4, they differentiated into fully activated plasmablasts (B220<sup>+</sup>CD95<sup>+</sup>).

640 The low dose administration induced the extrafollicular but not GC-associated antibody  
641 switching, and, therefore, turned to be not favorable for somatic hypermutation, which is essential  
642 for high affinity antibody production. Somatic hypermutation always occurs within GCs [62].  
643 These high affinity IgE are associated with severe anaphylactic reactions. However, we have  
644 clearly observed significant anaphylaxis response in mice (*Fig. 1*) This was in agreement with  
645 previously published data [22]. The possible explanation is that some occasional B-cells express  
646 surface BCR with relatively high affinity to novel antigen even prior to somatic hypermutation,  
647 and these particular cells differentiates into plasmablasts [63]. Our findings in are not consistent  
648 with recently published study which clearly demonstrated the essential role of IL-4<sup>+</sup>IL-13<sup>+</sup> Tfh in

649 production of high affinity IgE [64]. However, the authors used high dose immunization protocol  
650 in knockout mice with conditional deletion of DOCK8 in CD4<sup>+</sup> T cells. In this model, DOCK8  
651 deficiency reveals unique IL-4<sup>+</sup>IL-13<sup>+</sup> Th set not only in T-follicular but also in T-extrafollicular  
652 cell compartment. Therefore, DOCK8 knockout could be responsible for increased IgE production  
653 not only due to appearance of IL-4-IL-13 double producers in T-follicular helpers but also in  
654 extrafollicular T-helpers [64]. Our results are in agreement with several clinical investigations  
655 which maintain that local B-cell IgE class switching mostly depend on extrafollicular B-cell  
656 activation [10, 65]. Earlier studies based on IgE reporter mice and adoptive transfer experiments  
657 of IgG1 switched B-cells suggest two waves of IgE<sup>+</sup> cells generation. During the first wave  
658 extrafollicular response and direct  $\mu$ - $\epsilon$  class switching were detected. The second wave is  
659 characterized by sequential  $\gamma$ 1- $\epsilon$  class switching and GC response and gives rise to stable IgE  
660 production [66]. Our observation that IgE class switch occurs in extrafollicular B cells (Fig. 4, 5)  
661 partially confirms this theory.

662 We emphasize here that all plasmablasts in our model were derived from conventional B-  
663 2 B-cells as verified by the absence of B-1a and MZ-B markers expression (Figure S5). We did  
664 not observe significant sustained accumulation of either B-1a or MZ-B cells. The participation of  
665 CD5-B220-CD19<sup>+</sup> B-1b cells in extrafollicular IgE production is highly unlikely since these  
666 subsets rarely produce high or medium affinity antibodies and are predisposed to IgG and IgA  
667 class switching [68]. So, our extrafollicular IgE production must be T-cell dependent.

668 In our work, we have clearly shown that sustained plasmablasts activation is linked with  
669 extrafollicular T- helpers accumulation and rapid IgE class switching in subcutaneous adipose  
670 tissue in comparison to abdominal fat and regional lymph nodes. We could not completely identify  
671 cell populations which produced type 2 cytokines, such as IL-4, for the switching *per se* at the  
672 early stages. The current data did not provide evidence for the contribution of Th2 (Fig. S10). The  
673 tendency of ILC2 to accumulate in subcutaneous fat was insignificant due to high mouse-to-mouse

674 variability. Meanwhile, the accumulation of NK cells as potential regulators of IgE response [50]  
675 in lymph nodes was detected only at later stages of IgE production, in relation to delayed IgE  
676 production in abdominal fat, which is in line with previous publication [50]. Further works will  
677 address these questions.

678 One of the most importance output from our work is that in allergically predisposed  
679 subjects, humoral immune response to low antigen doses entering due to defects in barrier tissues  
680 is markedly different in subcutaneous vs. abdominal fat. Numerous works are aimed to understand  
681 mechanisms of formation and function of fat-associated lymphoid clusters in visceral, usually  
682 abdominal, adipose tissue [69]. Despite that allergens penetrating skin barrier, in fact, enter the  
683 body through subcutaneous fat, a few studies [13, 14] yet provide information on fat-associated  
684 B-cell. Frasca et al. [14] observed that pro-inflammatory cytokines secreted by adipocytes  
685 promoted T-bet and CD11c expression on subcutaneous withers associated B-cells. The expression  
686 of these molecules on CD19<sup>+</sup> B-cells identifies extrafollicular plasmablasts subpopulation with  
687 specific properties. These B-cells associated with subcutaneous adipose tissue are capable to form  
688 FALCs of different sizes as well as diffuse infiltrates [13, 70-72]. We can hypothesize that tissue  
689 variations in T-bet regulation may also contribute to remarkable differences in B and T cell  
690 response within subcutaneous vs. visceral fat. On the other hand, failures in extrafollicular  
691 response in visceral fat can be attributed to accumulation of different antigen presenting cells or  
692 regulatory CD4<sup>+</sup>NK cells within abdominal tissue upon antigen treatment (Fig. S15).

693 The transient nature of GCs formation in the regional lymph node requires particular  
694 explanations. We presume that certain adipocyte released mediators such as free fatty acids [73]  
695 may play a role by triggering unfolded protein response [74] in B cells resulting in enhanced  
696 plasma cells and plasmablasts development instead of stable GC persistence [75].

697 Overall, we show here that in subcutaneous adipose tissue, the response to low antigen  
698 doses is extrafollicular by its nature and based primarily on activation of CD19<sup>+</sup>B220<sup>+</sup>CD38<sup>-</sup>  
699 CD95<sup>+</sup> plasmablasts. Accumulation of CXCR4<sup>+</sup>CXCR5<sup>-</sup> extrafollicular T- helpers is also critical

700 for this response. This unique type of immune response creates specific pattern of humoral  
701 response which is characterized by high IgE production accompanied by minimal IgG1 production  
702 and leads to allergy development. Subcutaneous fat tissue but not abdominal fat tissue and SLOs  
703 provide the most favorable conditions for development of such response. Although some questions  
704 remains unresolved in our work, we suppose that these results are very important. It becomes clear  
705 that future development of new methods of allergy prevention in prone individuals should be  
706 aimed not only at stimulation of GC formation where protective IgG1 antibody-producing clones  
707 are formed [76] but also at extrafollicular B-cell response blockage. The latter in some cases may  
708 be even more important because in our model local environment in subcutaneous fat obviously  
709 supports extrafollicular but not GC response even at high dose regime of immunization. Novel  
710 potential therapeutics also must disrupt extrafollicular B-cell activation both in SLOs and in TLSs.

711

712

713

714

715

716

717

718

719

720

721

722

723

724

725

726            **Abbreviations**

727            BCR - B-cell receptor

728            ELISA – Enzyme linked Immunosorbent Assay

729            FALCs – Fat associated lymphoid clusters

730            GC – germinal centers

731            iBALT – inducible bronchial associated lymphoid tissue

732            i.p. - intraperitoneal

733            LN – Lymph nodes

734            OVA - Ovalbumin

735            PCR – polymerase chain reaction

736            s.c. - subcutaneous

737            SLOs – secondary lymphoid organs

738            Tfh – T-follicular helpers

739            Th – T helpers

740            TLSs – tertiary lymphoid structures

741

742            **Acknowledgements**

743            We thank Senior Scientist of Laboratory of Molecular Diagnostics IBCh RAS Ryasantsev D.Yu.

744            for useful advices on primer and probe design and quantitative PCR performance.

745            The reported study was founded by RFBR according to the research projects number 19-015-

746            00099 and 19-05-50064.

747

748

749

750

751 **Author contibution**

752 Conceived and designed experiments: CDB, FGV., SEV. Performed experiments: CDB, FGV,  
753 KMV, TDS, SMA. Analyzed the data: CDB, KOD, SAA, SEV. Wrote the paper: CDB, FGV,  
754 SEV.

755

756

757

758

759

760

761

762

763

764

765

766

767

768

769

770

771

772

773

774

775

## 776 **References**

- 777           1. Ober C, Yao T.-S. The genetics of asthma and allergic disease: a 21st century  
778 perspective. *Immunol. Rev.* 2011 242: 10-30.
- 779           2. Benedetto AD, Rafaels NM, McGirt LY, Ivanov AI, Geora SN, Cheadle C, et al. Tight  
780 junction defects in atopic dermatitis. *J. Allergy Clin. Immunol.* 2011 127: 773-786e7.
- 781           3. Sweerus K, Lachowicz-Scroggins M, Gordon E, LaFemina M, Huang X, Parikh M, et  
782 al. Claudin-18 deficiency is associated with airway epithelial barrier dysfunction and asthma. *J.*  
783 *Allergy Clin. Immunol.* 2017 139: 72-81e1.
- 784           4. Lambrecht BN, Hammad H. Allergens and the airway epithelium response: gateway to  
785 allergic sensitization. *J. Allergy Clin. Immunol.* 2014 134: 499-507.
- 786           5. Gevaert P, Nouri-Aria KT, Wu H, Harper CE, Takhar P, Fear DJ, et al. Local receptor  
787 revision and class switching to IgE in chronic rhinosinusitis with nasal polyps. *Allergy.* 2013  
788 68:55-63.
- 789           6. Baba S, Kondo K, Toma-Hirano M, Kanaya K, Suzukawa K, Ushio M, et al. Local  
790 increase in IgE and class switch recombination to IgE in nasal polyps in chronic rhinosinusitis.  
791 *Clin. Exp. Allergy.* 2014 44: 701-712.
- 792           7. Kuroda E, Ozasa K, Temizoz B, Ohata K, Koo CX, Kanuma T, et al. Inhaled fine  
793 particles induce alveolar macrophage death and interleukin-1a release to promote inducible  
794 bronchus-associated lymphoid tissue formation. *Immunity.* 2016 45:1299-1310.
- 795           8. Lindell DM, Berlin AA, Schaller MA, Lukacs NW. B cell antigen presentation  
796 promotes Th2 responses and immunopathology during chronic allergic lung disease. *PLoS One.*  
797 2008 3(9) :e3129.
- 798           9. Drake LY, Iijima K, Hara K, Kobayasi T, Kephart GM, Kita H. B Cells Play Key Roles  
799 in Th2-type airway immune responses in mice exposed to natural airborne allergens. *PLoS one.*  
800 2015 10: e0121660.



- 801           10. Feldman S, Kasjanski R, Popolski J, Hernandez D, Chen JN, Norton JE, et al. Chronic  
802 airway inflammation provides a unique environment for B cell activation and antibody production.  
803 Clin. Exp. Allergy. 2017 47: 457-466.
- 804           11. Benezech C, Luu N-T, Walker JA, Kruglov AA, Loo Y, Nakamura K, et al.  
805 Inflammation-induced formation of fat-associated lymphoid clusters. Nat. Immunol. 2015 16: 819-  
806 828.
- 807           12. Khan S, Tsai S, Winner DA. Adipose tissue B cells come of age: The AABs of fat  
808 inflammation. Cell Metab. 2019 30: 997-999.
- 809           13. McDonnell ME, Ganley-Leal LM, Mehta A, Bigornia SJ, Mott M, Rehman Q, et al.  
810 B lymphocytes in human subcutaneous adipose crown-like structures. Obesity (Silver Spring).  
811 2012 20(7): 1372-1378.
- 812           14. Frasca D, Diaz A, Romero M, Thaller S, Blomberg BB. Secretion of autoimmune  
813 antibodies in the human subcutaneous adipose tissue. PLoS One. 2018 13: e0197472.
- 814           15. Peters U, Dixon A, Forno E. Obesity and asthma. J. Allergy Clin. Immunol. 2018 141:  
815 1169-1179.
- 816           16. Shore SA, Schwartzman IN, Mellema MS, Flynt L, Imrich A, Johnston RA. Effect of  
817 leptin on allergic airway responses in mice. J. Allergy Clin. Immunol. 2005 115: 103-109.
- 818           17. Shore SA, Terry RD, Flynt L, Xu A, Hug C. Adiponectin attenuates allergen-induced  
819 airway inflammation and hyperresponsiveness in mice. J. Allergy Clin. Immunol. 2006 118: 389-  
820 395.
- 821           18. Niederberger V, Niggemann B, Kraft D, Spitzauer S, Valenta R. Evolution of IgM,  
822 IgE and IgG (1-4) antibody responses in early childhood monitored with recombinant allergen  
823 components: implications for class switch mechanisms. Eur. J. Immunol. 2002 32: 576-584.
- 824           19. Resch Y, Michel S, Kabesch M, Lupineck C, Valenta R, Vrtala S. Different IgE  
825 recognition of mite allergen components in asthmatic and non-asthmatic children. J. Allergy Clin.  
826 Immunol. 2015 136: 1083-1091.

- 827           20. Svirschevskaya E, Fattakhova G, Khlgatian S, Chudakov D, Kashirina E, Ryasantsev  
828 D, et al. Direct versus sequential immunoglobulin switch in allergy and antiviral responses. Clin.  
829 Immunol. 2016 170: 31-38.
- 830           21. Kim DI, Song M-K, Lee K. Comparison of asthma phenotypes in OVA-induced mice  
831 challenged via inhaled and intranasal routes. BMC Pulm. Med. 2019 19: 241.
- 832           22. Jiménez-Saiz R, Chu DK, Mandur TS, Walker TD, Gordon ME, Chaudhary R, et al.  
833 Lifelong memory responses perpetuate humoral Th2 immunity and anaphylaxis in food allergy. J.  
834 Allergy Clin. Immunol. 2017 140: 1604-1615e5.
- 835           23. Chang Y-S, Kim Y-K, Jeon SG, Kim S-H, Kim S-S, Park H-W, et al. Influence of the  
836 adjuvants and genetic background on the asthma model using recombinant Der f 2 in mice.  
837 Immune Netw. 2013 13: 295-300.
- 838           24. Arps V, Sudowe S, Kolsh E. Antigen dose-dependent differences in IgE antibody  
839 production are not due to polarization towards Th1 and Th2 cell subsets. Eur J. Immunol. 1998  
840 28: 681-686.
- 841           25. Kolbe L, Heusse CH, Kolsch E. Isotype-associated recognition of allergen epitopes  
842 and its modulation by antigen dose. Immunology. 1995 84: 285-289.
- 843           26. Raemdonck K, Baker K, Dale N, Dubuis E, Shala F, Belvisi MG, et al. CD4+ and  
844 CD8+ T cells play a central role in a HDM driven model of allergic asthma. BMC Respir. Res.  
845 2016 17: 45.
- 846           27. Furuhashi K, Chua YL, Wong KHS, Zhou Q, Lee DCP, Liong KH, et al. Priming  
847 with high and low respiratory allergen dose induces differential CD4+ T helper type 2 cells and  
848 IgE/IgG1 antibody responses in mice. J. Immunol. 2017 151: 227-238.
- 849           28. Chudakov DB, Ryasantsev DYu, Tsaregorotseva DS, Kotsareva OD, Fattakhova GV,  
850 Svirschevskaya EV. Tertiary lymphoid structure related B-cell IgE isotype switching and  
851 secondary lymphoid organ linked IgE production in mouse allergy model. BMC Immunology.  
852 2020 21: 45.

- 853           29. Schoetti T, Fisher IP, Ussar S. Heterogeneity of adipose tissue in development and  
854 metabolic function. *J. Exp. Biol.* 2018 7(Pt Suppl 1).
- 855           30. Nials AT, Uddin S. Mouse models of allergic asthma: acute and chronic allergen  
856 challenge. *Dis. Model. Mech.* 2008 1(4-5) 213-220.
- 857           31. Bantz SK, Zhu Z, Zeng T. The atopic march: progression from atopic dermatitis to  
858 allergic rhinitis and asthma. *J. Clin. Cell. Immunol.* 2014 5: 202.
- 859           32. Eckl-Dorna E, Villazala-Merino S, Linhart B, Karaulov AV, Zhernov Y, Khaitov M,  
860 Niederberger-Leppin V, Valenta R. Allergen-specific antibodies regulate secondary allergen-  
861 specific immune responses. *Front. Immunol.* 2018;9:3131.
- 862           33. Kawakami Y, Sielski R, Kawakami T. Mouse body temperature measurement using  
863 infrared thermometer during passive systemic anaphylaxis and food allergy evaluation. *J. Vis. Exp.*  
864 2018; 14: 58391.
- 865           34. Zeng M, Hu Z, Shi X, Li X, Zhan X, Li X-D, et al. MAVS, cGAS, and endogenous  
866 retroviruses in T-independent B cell responses. *Science.* 2014 346: 1486-1492.
- 867           35. Shinall SM, Gonzalez-Fernandez M, Noelle RJ, Waldschmidt TJ. Identification of  
868 Murine GC B cell subsets defined by the expression of surface isotypes and differentiation  
869 antigens. *J. Immunol.* 2000 164: 5729-5738.
- 870           36. Finke D, Baribaud F, Diggelmann H, Acha-Orbea H. Extrafollicular plasmablast b  
871 cells play a key role in carrying retroviral infection to peripheral organs. *Immunology.* 2001 166:  
872 6266-6275.
- 873           37. Gold MJ, Antignano F, Halim TY, Hirota JA, Blanchet M-R, Zaph C, et al. Group 2  
874 innate lymphoid cells facilitate sensitization to local, but not systemic, TH2-inducing allergen  
875 exposures. *J. Allergy Clin. Immunol.* 2014 133: 1142-1148.
- 876           38. Elsner RA, Ernst DN, Baumgarth N. Single and coexpression of cxcr4 and cxcr5  
877 identifies cd4 t helper cells in distinct lymph node niches during influenza virus infection. *J. Virol.*  
878 2012 86: 7146-7157.

- 879           39. Kobayashi T, Iijima K, Dent AL, Kita H. Follicular helper T (T<sub>fh</sub>) cells mediate IgE  
880 antibody response to airborne allergens. *J. Allergy Clin. Immunol.* 2017 139: 300-313e7.
- 881           40. Faquim-Mauro EL, Coffman RL, Abrahamsohn IA, Macedo MS. Cutting edge:  
882 mouse IgG1 antibodies comprise two functionally distinct types that are differentially regulated  
883 by IL-4 and IL-12. *J. Immunol.* 1999 163: 3572-3576.
- 884           41. Beutier H, Gillis CM, Iannascoli B, Godon O, England P, Sibilano R, et al. IgG  
885 subclasses determine pathways of anaphylaxis in mice. *J. Allergy Clin. Immunol.* 2017 139(1):  
886 269-280e8.
- 887           42. Finkelman FD. Anaphylaxis: lessons from mouse models. *J. Allergy Clin. Immunol.*  
888 2007 120: 506-515.
- 889           43. Turner ML, Corcoran LM, Brink R, Hodgkin PD. High-affinity B cell receptor  
890 ligation by cognate antigen induces cytokine-independent isotype switching. *J. Immunol.* 2010  
891 184: 6592-6599.
- 892           44. Schattner E, Friedman SM. Fas expression and apoptosis in human B cells. *Immunol.*  
893 *Research.* 1996 15: 246-257.
- 894           45. Yang Z, Sullivan BM, Allen CD. Fluorescent in vivo detection reveals that IgE<sup>+</sup> B  
895 cells are restrained by an intrinsic cell fate predisposition. *Immunity.* 2012 36: 857-872.
- 896           46. Odegard JM, Marks BR, DiPlacido RD, Poholek AC, Kono DH, Dong C, et al. ICOS-  
897 dependent extrafollicular helper T cells elicit IgG production via IL-21 in systemic autoimmunity.  
898 *J. Exp. Med.* 2008 205: 2873-2886.
- 899           47. Crotty S. T<sub>fh</sub> cell differentiation, function, and roles in disease. *Immunity.* 2014 41:  
900 529-542.
- 901           48. Allen JE, Maizels RM. Diversity and dialogue in immunity to helminthes. *Nat. Rev.*  
902 *Immunol.* 2011 11: 375-388.
- 903           49. Vomhof-DeKrey EE, Yates J, Leadbetter EA. Invariant NKT cells provide innate and  
904 adaptive help for B cells. *Curr. Opin. Immunol.* 2014 28: 12-17.

- 905           50. Enoksson SL, Grasset EK, Hagglof T, Mattsson N, Kaiser Y, Gabrielsson S, et al.  
906   The inflammatory cytokine IL-18 induces self-reactive innate antibody responses regulated by  
907   natural killer T cells. PNAS. 2011 108: E1399-1407.
- 908           51. Kovac K, Dodig S, Tjesić-Drinković D, Raos M. Correlation between asthma severity  
909   and serum ige in asthmatic childrensensitized to *Dermatophagoides pteronyssinus*. Arch Med.  
910   Res. 2007 38: 99-105.
- 911           52. Miranda DO, Silva DA, Fernandes JF, Queiros MG, Chiba HF, Ynoue LH, et al.  
912   Serum and salivary IgE, IgA, and IgG4 antibodies to Dermatophagoides pteronyssinus and its  
913   major allergens, Der p1 and Der p2, in allergic and nonallergic children. Clin. Dev. Immunol. 2011  
914   2011: 302739.
- 915           53. Talay O, Yan D, Brightbill HD, Straney EE, Zhou M, Ladi E, et al. IgE+ memory B  
916   cells and plasma cells generated through a germinal-center pathway. Nat. Immunol. 2012 13: 396-  
917   404.
- 918           54. Butt D, Chan TD, Bourne K, Hermes JR, Nguyen A, Statham A, et al. FAS  
919   inactivation releases unconventional GC B cells that escape antigen control and drive ige and  
920   autoantibody production. Immunity. 2015 42: 890-902.
- 921           55. Chen X, Jensen PE. The role of B lymphocytes as antigen-presenting cells. Arch.  
922   Immunol. Ther. Exp (Warsz). 2008 56: 77-83.
- 923           56. Merad M, Sathe P, Helft J, Miller J, Mortha A. The dendritic cell lineage: ontogeny  
924   and function of dendritic cells and their subsets in the steady state and the inflamed setting. Annu.  
925   Rev. Immunol. 2013 31: 563-604.
- 926           57. Zhang Y-N, Poon W, Sefton E, Chan WC. Suppressing subcapsular sinus  
927   macrophages enhances transport of nanovaccines to lymph node follicles for robust humoral  
928   immunity. ACS Nano. 2020 14: 9478-9490.
- 929           58. Gray EE, Cyster JG. Lymph node macrophages. J. Innate Immun. 2012 4: 424-436.

- 930           59. De Silva NS, Klein U. Dynamics of B cells in GCs. *Nat. Rev. Immunol.* 2015 15:  
931 137-148.
- 932           60. Cattoretti G, Buttner M, Schaknovich R, Kremmer E, Alobeid B, Niedobitek G.  
933 Nuclear and cytoplasmic AID in extrafollicular and GC B cells. *Blood.* 2006 107: 3967-3975.
- 934           61. Marshall JL, Zhang Y, Pallan L, Hsu M-C, Khan M, Cunningham AF, et al. Early B  
935 blasts acquire a capacity for Ig class switch recombination that is lost as they become plasmablasts.  
936 *Eur. J. Immunol.* 2011 41: 3506-3512.
- 937           62. Roco JA, Mesin L, Binder SC, Nefzger C, Gonzalez-Figueroa P, Canete PF, et al.  
938 Class-switch recombination occurs infrequently in GCs. *Immunity.* 2019 51:337-350e7.
- 939           63. Chan TD, Gatto D, Wood K, Camidge T, Basten A, Brink R. Antigen affinity controls  
940 rapid T-dependent antibody production by driving the expansion rather than the differentiation or  
941 extrafollicular migration of early plasmablasts. *J. Immunol.* 2009 183:3139-3149.
- 942           64. Gowthaman U, Chen JS, Zhang B, Flynn WF, Lu Y, Song W, et al. Identification of  
943 a Tfh cell subset that drives anaphylactic IgE. *Science.* 2019 365(6456): 6433.
- 944           65. Ramonell RP, Woodruff MC, Saney CL, Duan M, Lee E-H. Mucosal IgE antibody  
945 secreting cell (ASC) repertoire analysis suggests an extrafollicular developmental program. *J.*  
946 *Immunol.* 2020 204(S1): 66.
- 947           66. Yang Z, Robinson MJ, Allen CD. Regulatory constraints in the generation and  
948 differentiation of IgE-expressing B cells. *Curr. Opin. Immunol.* 2014 28: 64-70.
- 949           67. Moutsoglou DM, Dreskin SC. B cells establish, but do not maintain, long-lived  
950 murine anti peanut IgE. *Clin. Exp. Allergy.* 2016 46: 640-653.
- 951           68. Baumgarth N. The double life of a B-1 cell: self-reactivity selects for protective  
952 effector functions. *Nat. Rev. Immunol.* 2011 11: 34-46.
- 953           69. Cruz-Migoni S., Caamano J. Fat-associated lymphoid clusters in inflammation and  
954 immunity. *Front. Immunol.* 2016 7: 612.

- 955           70. Woodroff MC, Ramonell RP, Sanz I. Extrafollicular B cell responses correlate with  
956 neutralizing antibodies and morbidity in COVID-19. *Nat. Immunol.* 2020 21: 1506-1516.
- 957           71. Rubtsova K, Rubtsov AV, Cancro MP, Marrack P. Age-Associated B Cells: A T-bet–  
958 dependent effector with roles in protective and pathogenic immunity. *J. Immunol.* 2015; 195:  
959 1933-1937.
- 960           72. Racine R, Chatterjee M, Winslow GM. CD11c Expression identifies a population of  
961 extrafollicular antigen-specific splenic plasmablasts responsible for CD4 T-independent antibody  
962 responses during intracellular bacterial infection. *J. Immunol.* 2008 181(2): 1375-1385.
- 963           73. Freigang S, Ampenberger F, Weiss A, Kanneganti T-D, Iwakura Y, Hersberger M, et  
964 al. Fatty acid–induced mitochondrial uncoupling elicits inflammasome-independent IL-1 $\alpha$  and  
965 sterile vascular inflammation in atherosclerosis. *Nat. Immunol.* 2013 14: 1045-1053.
- 966           74. Tzeng H-T, Chyuan I-T, Chen W-Y. Shaping of innate immune response by fatty acid  
967 metabolite palmitate. *Cells.* 2019 8: 1633.
- 968           75. Gaudette BT, Jones DD, Bortnick A, Argon Y, Allman D. mTORC1 coordinates an  
969 immediate unfolded protein response-related transcriptome in activated B cells preceding antibody  
970 secretion. *Nat. Commun.* 2020 11: 723.
- 971           76. Fujita H, Soyka MB, Akdis M, Akdis CA. Mechanisms of allergen-specific  
972 immunotherapy. *Clin. Transl. Allergy.* 2012 2: 2.
- 973
- 974
- 975
- 976
- 977
- 978
- 979

980 **Figure legends**

981 **Figure 1.**

982 **Low but not high dose immunization represents clinically relevant mouse allergy model**  
983 **characterized by high IgE production, anaphylaxis intensity and minimal IgG1 production.**

984 BALB/c mice were immunized by low (100 ng) (A-C) or high (10000 ng) (D-F) OVA doses 3  
985 times a week for 4 weeks. Specific IgE (A, D) and IgG1 (B, E) titers, temperature changes (C, F)  
986 were measured at different time points upon allergen challenge ~~were measured~~ and compared to  
987 saline immunized animals. Comparison of IgE (G), IgG1 (H) production and anaphylaxis severity  
988 (I) between high and low dose immunized mice at 28<sup>th</sup> day. Correlations between IgE production  
989 and anaphylaxis severity in low (n=24) (J) and high dose (n=11) (K) groups. \*/\*\* - p <0.05/0.01  
990 between indicated group and saline immunized mice. §/§§ - p<0.05/0.01 between crossbars  
991 marked groups.

992

993 **Figure 2.**

994 **B-cell IgE class switching occurs in withers adipose tissue prior regional lymph nodes and**  
995 **leads to the formation of IgE<sup>low</sup> and IgE<sup>high</sup> B-cells. Both adipose tissue and lymph node IgE<sup>low</sup>**  
996 **B-cells are associated with specific IgE production.**

997 Expression of germline transcripts and presence of DNA excision circles linked with IgE class  
998 switching in subcutaneous withers fat tissue (s.c.f.) (A) and regional lymph nodes (LN) (B).  
999 Representative flow cytometry pseudocolor plots (C). Roman numbers corresponds to following  
1000 subpopulations: I – IgE<sup>-</sup> B-cells; II – IgE<sup>low</sup> B-cells; III – IgE<sup>high</sup> B-cells. Presence of IgE<sup>low</sup> and  
1001 IgE<sup>high</sup> B-cells in withers tissue and lymph nodes (D). Correlations between IgE<sup>+</sup> cells content in  
1002 withers tissue or lymph node lymphocytes and IgE production (n=12) (E). \*/\*\* - p <0.05/0.01  
1003 between indicated group and intact mice. §/§§ - p<0.05/0.01 between crossbars marked groups.

1004



1005 **Figure 3.**

1006 **IgG1 class switching occurs at the same time points after the start of antigen administration**  
1007 **in tissue and regional lymph nodes, but bulk levels of IgG1 antibodies are produced**  
1008 **exclusively by IgG1<sup>+</sup> B cells in regional lymph nodes.**

1009 Expression of germline  $\gamma 1$  transcripts (A). Representative flow cytometry pseudocolor plots (B).  
1010 Roman numbers corresponds to following suppopulations: I – IgG1<sup>-</sup> B-cells; II – IgE<sup>low</sup> B-cells;  
1011 III – IgE<sup>high</sup> B-cells. Quantification of IgG1<sup>+</sup> cells in subcutaneous fat withers tissue (s.c.f.) and  
1012 regional lymph nodes (LN) (C). Correlation of IgG1<sup>+</sup> cells' relative numbers with IgG1 titers (D).  
1013 **\*/\*\***  $p < 0.05/0.01$  between indicated group and intact mice. **§/§§** -  $p < 0.05/0.01$  between crossbars  
1014 marked groups.

1015

1016 **Figure 4.**

1017 **Acquisition of plamablastic phenotype by IgE<sup>low</sup> rather than IgE<sup>high</sup> and IgG1<sup>+</sup> B-cells.**  
1018 **Expression of B220, CD95 and CD38 on IgE<sup>low</sup>, IgE<sup>high</sup> and IgG1<sup>+</sup> B-cells.**

1019 Representative flow cytometry histograms comparing isotype control (thin line, grey filled), total  
1020 B-cells fraction (medium line, red filled), and respective subcutaneous fat tissue B-cell  
1021 subpopulation on 14<sup>th</sup> day of (thick line, crimson) or on 28<sup>th</sup> day of OVA administration (thick  
1022 line, dark green) (A). Representative histograms comparing to isotype control (thin line, grey  
1023 filled), withers' B-cells fraction (medium line, red filled), IgE<sup>low</sup> B-cells (thick line, dark blue),  
1024 IgE<sup>high</sup> B-cells (thick line, pink), IgG1<sup>+</sup> B-cells (thick line, light green) on 28<sup>th</sup> day (B), Histograms  
1025 showing relative B220, CD95 and CD38 expression (C). **\*/\*\*** -  $p < 0.05/0.01$  between indicated  
1026 group and RFU of isotype ctrl labeled sample. **§/§§** -  $p < 0.05/0.01$  between crossbars marked  
1027 groups.

1028

1029

1030

1031 **Figure 5.**

1032 **B220- plasmablasts derived from B-2 B-cells, but not GCs, are induced in withers and**  
1033 **regional lymph nodes by low antigen dose and responsible for specific IgE production.**

1034 Representative flow cytometry contour plots of indicated withers B-cells subpopulations at  
1035 different time points (A). Roman numbers corresponds to the following subpopulations: I –  
1036 plasmablasts, II – Not plasmablast follicular B-2 B-cells; III – CD38<sup>-</sup>CD95<sup>+</sup> plasmablasts; IV –  
1037 CD38<sup>+</sup>CD95<sup>+</sup> plasmablasts; V – CD38<sup>+</sup>CD95<sup>-</sup> plasmablasts; VI – germinal centers; VII –  
1038 CD38<sup>+</sup>CD95<sup>+</sup> not plasmablast B-2 B-cells. Relative amount of GC B-cells and B220<sup>-</sup>CD38<sup>-</sup>CD95<sup>+</sup>  
1039 plasmablasts in all CD19<sup>+</sup> B-cells from withers tissue (B) and regional lymph nodes (D).  
1040 Correlations of relative B220<sup>-</sup>CD38<sup>-</sup>CD95<sup>+</sup> plasmablasts amount in subcutaneous withers fat tissue  
1041 (s.c.f.) (C) and regional lymph nodes (LN) (E) with specific IgE titers (n=24). \*/\*\* - p <0.05/0.01  
1042 between indicated group and intact mice. §/§§ - p<0.05/0.01 between crossbars marked groups.

1043

1044 **Figure 6.**

1045 **Extrafollicular T-helper cells, rather than follicular T-helpers or CXCR4<sup>-</sup>CXCR5<sup>+</sup> T-**  
1046 **helpers, are responsible for the formation of significant IgE production with minimal IgG1**  
1047 **response in withers adipose tissue after low dose antigen administration.**

1048 Representative flow cytometry contour plots of T-helpers subpopulations in subcutaneous withers  
1049 fat tissue of low and high dose immunized mice at different time points (A). Roman numbers  
1050 corresponds to the following subpopulations: I – CXCR4<sup>-</sup>CXCR5<sup>+</sup> T-helpers; II –  
1051 CXCR4<sup>+</sup>CXCR5<sup>+</sup> T-follicular helpers; III – CXCR4<sup>+</sup>CXCR5<sup>-</sup> extrafollicular T-helpers.  
1052 Quantification of T-helpers subpopulations in subcutaneous withers fat tissue (s.c.f.) (B) and  
1053 regional lymph nodes (LN) (C). \*/\*\* - p <0.05/0.01 between indicated group and intact mice. §/§§  
1054 - p<0.05/0.01 between crossbars marked groups.

1055

1056

1057 **Figure 7.**

1058 **Transient and unstable induction of extrafollicular plasmablasts, and lack of extrafollicular**  
1059 **Th accumulation are responsible for delayed and hampered antibodies production in**  
1060 **abdominal fat.**

1061 BALB/c mice were immunized by low OVA dose (100 ng) by i.p. route. Specific IgE (A), IgG1  
1062 (B) titers and anaphylactic severity (C) were measured and compared with respective parameters  
1063 of saline immunized animals. Comparison of specific IgE (D) and IgG1 production (E) between  
1064 mice immunized by low antigen dose via subcutaneous route in withers tissue and by i.p. low dose  
1065 immunized mice. Representative flow cytometry plots of indicated cell populations in abdominal  
1066 fat tissue (i.p.f.) at different time points (F). Roman numbers corresponds to the following  
1067 subpopulations: I – plasmablasts; II – not plasmablast B-2 B-cells; III – CD38<sup>-</sup>CD95<sup>+</sup>  
1068 plasmablasts; IV - CD38<sup>+</sup>CD95<sup>+</sup> plasmablasts; V – CD38<sup>+</sup>CD95<sup>-</sup> plasmablasts. Percentage of  
1069 indicated cell subpopulations (G). \*/\*\* - p <0.05/0.01 between indicated group and intact mice.  
1070 §/§§ - p<0.05/0.01 between crossbars marked groups.

1071

1072 **Figure S1.**

1073 **Immunization protocol.**

1074 Black arrows indicate days of immunization. Red arrows indicate days of blood collection and  
1075 mice sacrificing when samples of subcutaneous fat adipose tissue or abdominal fat tissue together  
1076 with regional lymph nodes was taken.

1077

1078 **Figure S2.**

1079 **IgE<sup>high</sup> B-cells are not be responsible for specific IgE production.**

1080 Correlations between relative content of IgE<sup>high</sup> B-cells in subcutaneous withers fat tissue (s.c.f.)  
1081 or lymph node (LN) lymphocytes and IgE production (n=12).

1082

1083 **Figure S3.**

1084 **IgE class switching in withers adipose tissue gives rise to the formation of IgE<sup>low</sup>, but not**  
1085 **IgE<sup>high</sup>, B-cells, and occurs by direct mechanism.**

1086 Correlations between relative numbers of IgE<sup>low</sup> (A-C) or IgE<sup>high</sup> (D-F) B-cells in subcutaneous  
1087 adipose tissue lymphocytes and expression of germline  $\epsilon$  transcripts (A, D), relative quantity of  
1088 circular  $\mu$ - $\epsilon$  (B, E) or circular  $\gamma$ 1- $\epsilon$  DNA excision fragments (n=12) (C, F).

1089

1090 **Figure S4.**

1091 **Subcutaneous fat adipose tissue in withers region contains tertiary lymphoid structures of**  
1092 **different sizes as well as irregularly shaped lymphoid infiltrates.**

1093 Representative histological images of mouse subcutaneous withers adipose tissue. Tissue samples  
1094 were taken from low dose immunized mice 4 weeks after the start of antigen administration.  
1095 Samples were stained with hematoxylin – eosin and images were taken at 100X magnification.  
1096 Adipose tissue is marked by white arrows, lymphoid clusters of different size are marked by black  
1097 arrows. Dense lymphoid infiltrates characterized by irregular shape or presence of adipocytes are  
1098 marked by grey arrows. Diffuse infiltrates are shown by brown arrows. Longitudinally cut  
1099 lymphatic vessel associated with large lymphoid cluster is marked by blue arrows. The border of  
1100 tertiary lymphoid structures and infiltrates is shown by red dashed lines.

1101

1102 **Figure S5.**

1103 **B-cells gating strategy.**

1104 Roman numbers corresponds to the following subpopulations: I - cells; II - Single cells; III – Live  
1105 cells; IV – CD5<sup>+</sup> B-cells; V – CD5<sup>-</sup> B-cells; VI – B-1a cells; VII – MZ-B B-cells; VIII – Follicular  
1106 B-2 B-cells; IX – Not plasmablast follicular B-2 B-cells; X – Plasmablasts; XI – CD38<sup>-</sup>CD95<sup>+</sup>  
1107 plasmablasts; XII – CD38<sup>+</sup>CD95<sup>+</sup> plasmablasts; XIII – CD38<sup>+</sup>CD95<sup>-</sup> plasmablasts; XV – germinal  
1108 centers; XVI – CD38<sup>+</sup>CD95<sup>+</sup> not plasmablast activated follicular B-2 B-cells.

1109 **Figure S6.**

1110 **In both withers and lymph nodes, the antigen-dependent induction of other B220-**  
1111 **plasmoblasts populations is weaker than of B220-CD38-CD95<sup>+</sup>cells.**

1112 Presence of indicated plasmablasts subpopulations in withers adipose tissue (A) or regional lymph  
1113 nodes (B) at different time points. Correlations of relative content of indicated plasmablasts  
1114 subpopulations in subcutaneous fat tissue (s.c.f.) (C) or lymph nodes (LN) (D) with specific IgE  
1115 titers. \*/\*\* -  $p < 0.05/0.01$  between indicated group and intact mice. §/§§ -  $p < 0.05/0.01$  between  
1116 crossbars marked groups.

1117

1118 **Figure S7.**

1119 **Percentage of GCs in withers adipose tissue and regional lymph nodes do not correlate with**  
1120 **specific IgE production.**

1121 Correlations between relative B220<sup>+</sup>CD38<sup>+</sup>CD95<sup>+</sup> GC B-cell numbers in withers fat tissue (s.c.f.)  
1122 B-cells or lymph node (LN) B-cells (n=24).

1123

1124 **Figure S8.**

1125 **Long term antigen administration does not cause any stable increase in either B-1a or MZ-**  
1126 **B cells in subcutaneous fat and regional lymph nodes.**

1127 Percentage of minor T-independent B-cell subpopulations in subcutaneous withers fat tissue  
1128 (s.c.f.) (A) and regional lymph nodes (LN) (B) at different time points. \*/\*\* - with  $p < 0.05/0.01$   
1129 between indicated group and intact mice.

1130

1131 **Figure S9.**

1132 **T-helper subsets, NK-cells and ILC2 cells gating strategy.**

1133 Roman numbers corresponds to the following subpopulations: I - cells; II - Single cells; III – Live  
1134 cells; IV – Lin<sup>-</sup>CD45<sup>+</sup> Cells; V – Lin<sup>+</sup>CD45<sup>+</sup> cells; VI – ILC2; VII – T-helpers; VIII – CD4<sup>+</sup> NK-

1135 cells; IX – CD4<sup>-</sup> NK-cells; X – CXCR4<sup>-</sup>CXCR5<sup>+</sup> cells; XI – T-follicular helpers; XII –  
1136 Extrafollicular T-cells; XIII – Naïve T-cells and T-effectors; XIV – T-helper 2 cells.

1137

1138 **Figure S10.**

1139 **Low impact of Th2 cells on early stage of response to low antigen doses.**

1140 Representative flow cytometry contour plots (A) and percentage of ST2<sup>+</sup>CXCR4<sup>-</sup>CXCR5<sup>-</sup> type 2  
1141 helper cells in total CD4<sup>+</sup> Th fraction from subcutaneous withers fat tissue (s.c.f.) and regional  
1142 lymph nodes (LN) of immunized mice in different time points (B). Roman numbers corresponds  
1143 to the following subpopulations: I – T-helper 2 effector cells \*/\*\* - p <0.05/0.01 between indicated  
1144 group and intact mice. §/§§ with p <0.05/0.01 between crossbars marked groups.

1145

1146 **Figure S11.**

1147 **ILC2 and NK-cells do not participate in regulation of specific IgE production in withers**  
1148 **adipose tissue but NK-cells potentially regulate in regional lymph nodes.**

1149 Representative flow cytometry images (A) and percents of indicated cell populations in  
1150 subcutaneous withers fat tissue (s.c.f.) (B) or regional lymph node (LN) CD45<sup>+</sup> cells (C). Roman  
1151 numbers corresponds to the following subpopulations: I – CD4<sup>-</sup>CD49b<sup>+</sup> NK-cells; II –  
1152 CD4<sup>+</sup>CD49b<sup>+</sup> NK-cells. \*/\*\* - p <0.05/0.01 between indicated group and intact mice. §/§§ -  
1153 p <0.05/0.01 between crossbars marked groups.

1154

1155 **Figure S12.**

1156 **Delayed kinetics of IgE class switching, IgE and IgG1 B-cell numbers increment in**  
1157 **abdominal fat tissue in comparison to subcutaneous withers fat tissue after continuous low**  
1158 **dose antigen administration.**

1159 Expression of indicated transcripts linked with Ig class switching in subcutaneous fat (s.c.f.) (A)  
1160 and abdominal fat (i.p.f.) (B) in different time points during continuous antigen administration.

1161 Representative flow cytometry pseudocolour plots (C) and relative amounts of IgE<sup>low</sup> and IgG1<sup>+</sup>  
1162 cells in subcutaneous and abdominal fat tissue (D). Roman numbers corresponds to the following  
1163 subpopulations: I – IgE<sup>-</sup> B-cells; II – IgE<sup>low</sup> B-cells; III – IgE<sup>high</sup> B-cells \*/\*\* - with p <0.05/0.01  
1164 between indicated group and intact mice.

1165

1166 **Figure S13.**

1167 **Representative flow cytometry plots of T-helper cells subpopulations in abdominal fat tissue**  
1168 **at different time points.**

1169 Roman numbers corresponds to the following subpopulations: I – CXCR4<sup>-</sup>CXCR5<sup>+</sup> T-helpers; II  
1170 – CXCR4<sup>+</sup>CXCR5<sup>+</sup> T-follicular helpers; III – CXCR4<sup>+</sup>CXCR5<sup>-</sup> extrafollicular T-helpers.

1171

1172 **Figure S14.**

1173 **No significant induction of GC B-cells and CXCR4<sup>-</sup>CXCR5<sup>+</sup> T-helpers in abdominal fat**  
1174 **tissue after low dose antigen administration.**

1175 Percentage of GC B-cells in B-cells and CXCR4<sup>-</sup>CXCR5<sup>+</sup> T-cells in T-helpers of abdominal fat  
1176 tissue at different time points. \*/\*\* - with p <0.05/0.01 between indicated group and intact mice.

1177

1178 **Figure S15.**

1179 **CD4<sup>+</sup>, but not CD4<sup>-</sup>, NK-cells could probably regulate delayed humoral immune response**  
1180 **in abdominal fat tissue.**

1181 Representative flow cytometry contour plots (A) and percent of CD4<sup>-</sup> and CD4<sup>+</sup> NK-cells  
1182 (CD49b<sup>+</sup>) in CD45<sup>+</sup> cells (B). Roman numbers corresponds to the following subpopulations: I –  
1183 CD4<sup>-</sup>CD49b<sup>+</sup> NK-cells; II – CD4<sup>+</sup>CD49b<sup>+</sup> NK-cells. \*/\*\* - p <0.05/0.01 between indicated group  
1184 and intact mice. §§§ - p <0.05/0.01 between crossbars marked groups.



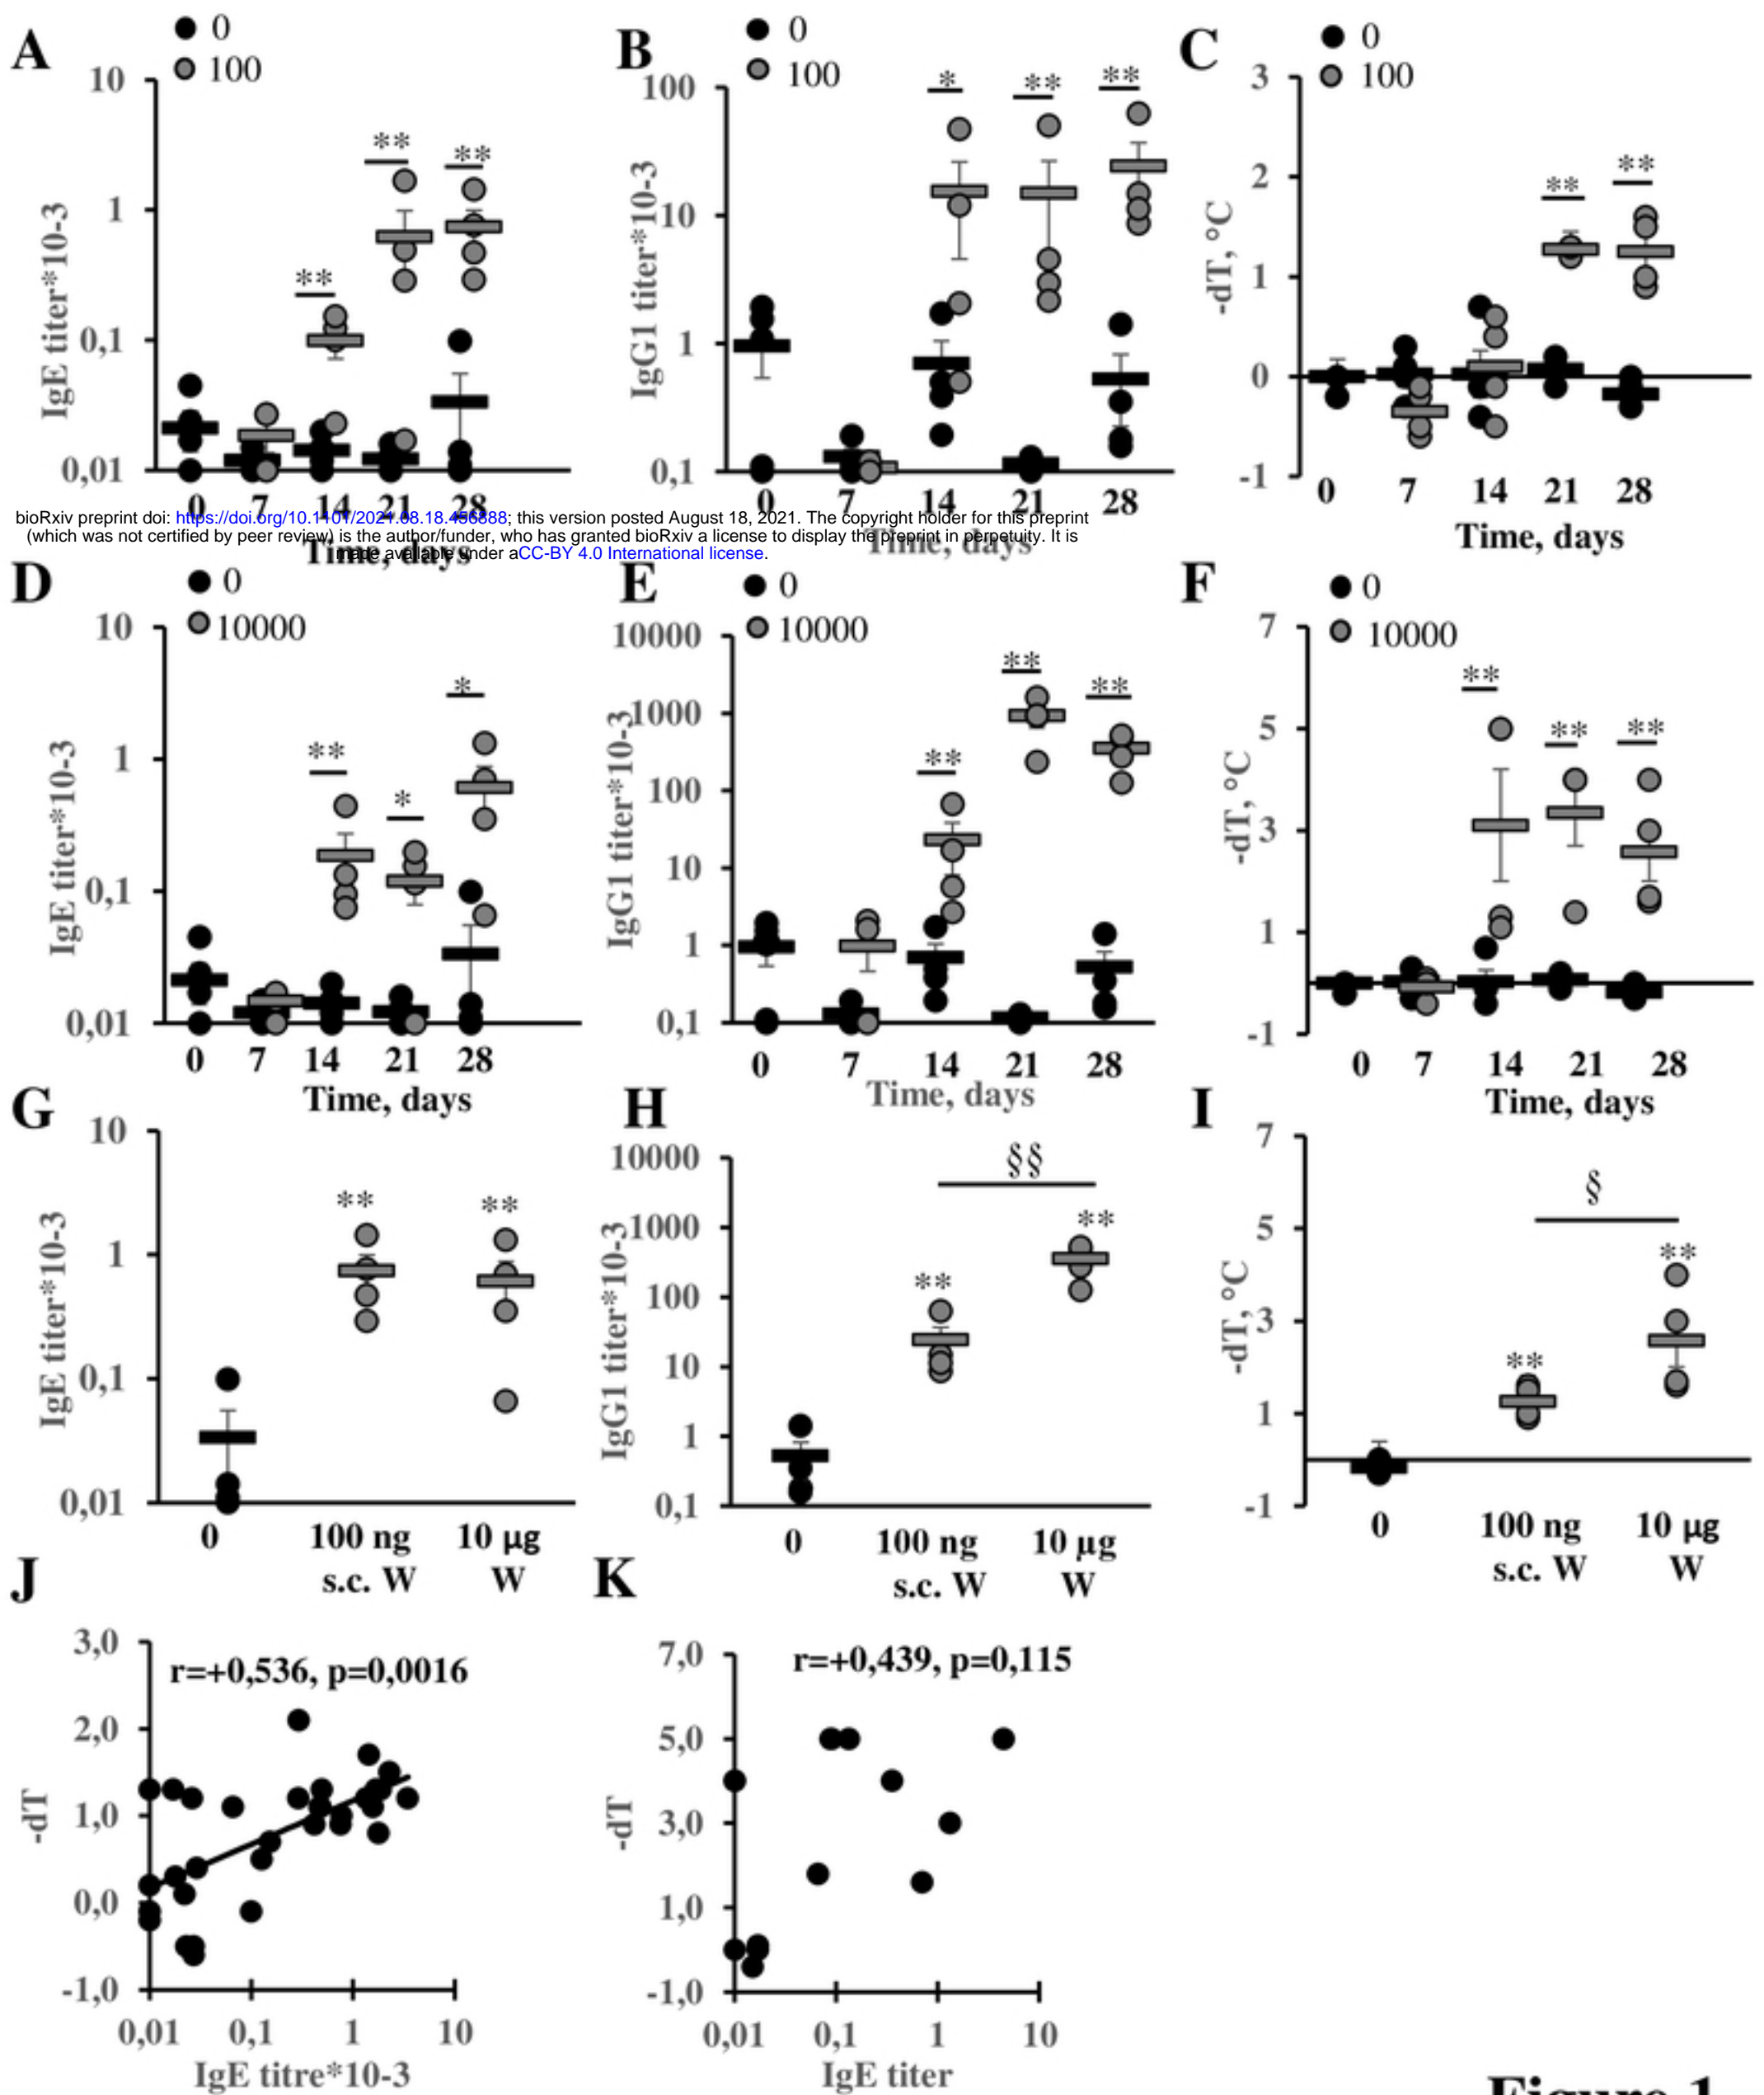

**Figure 1.**



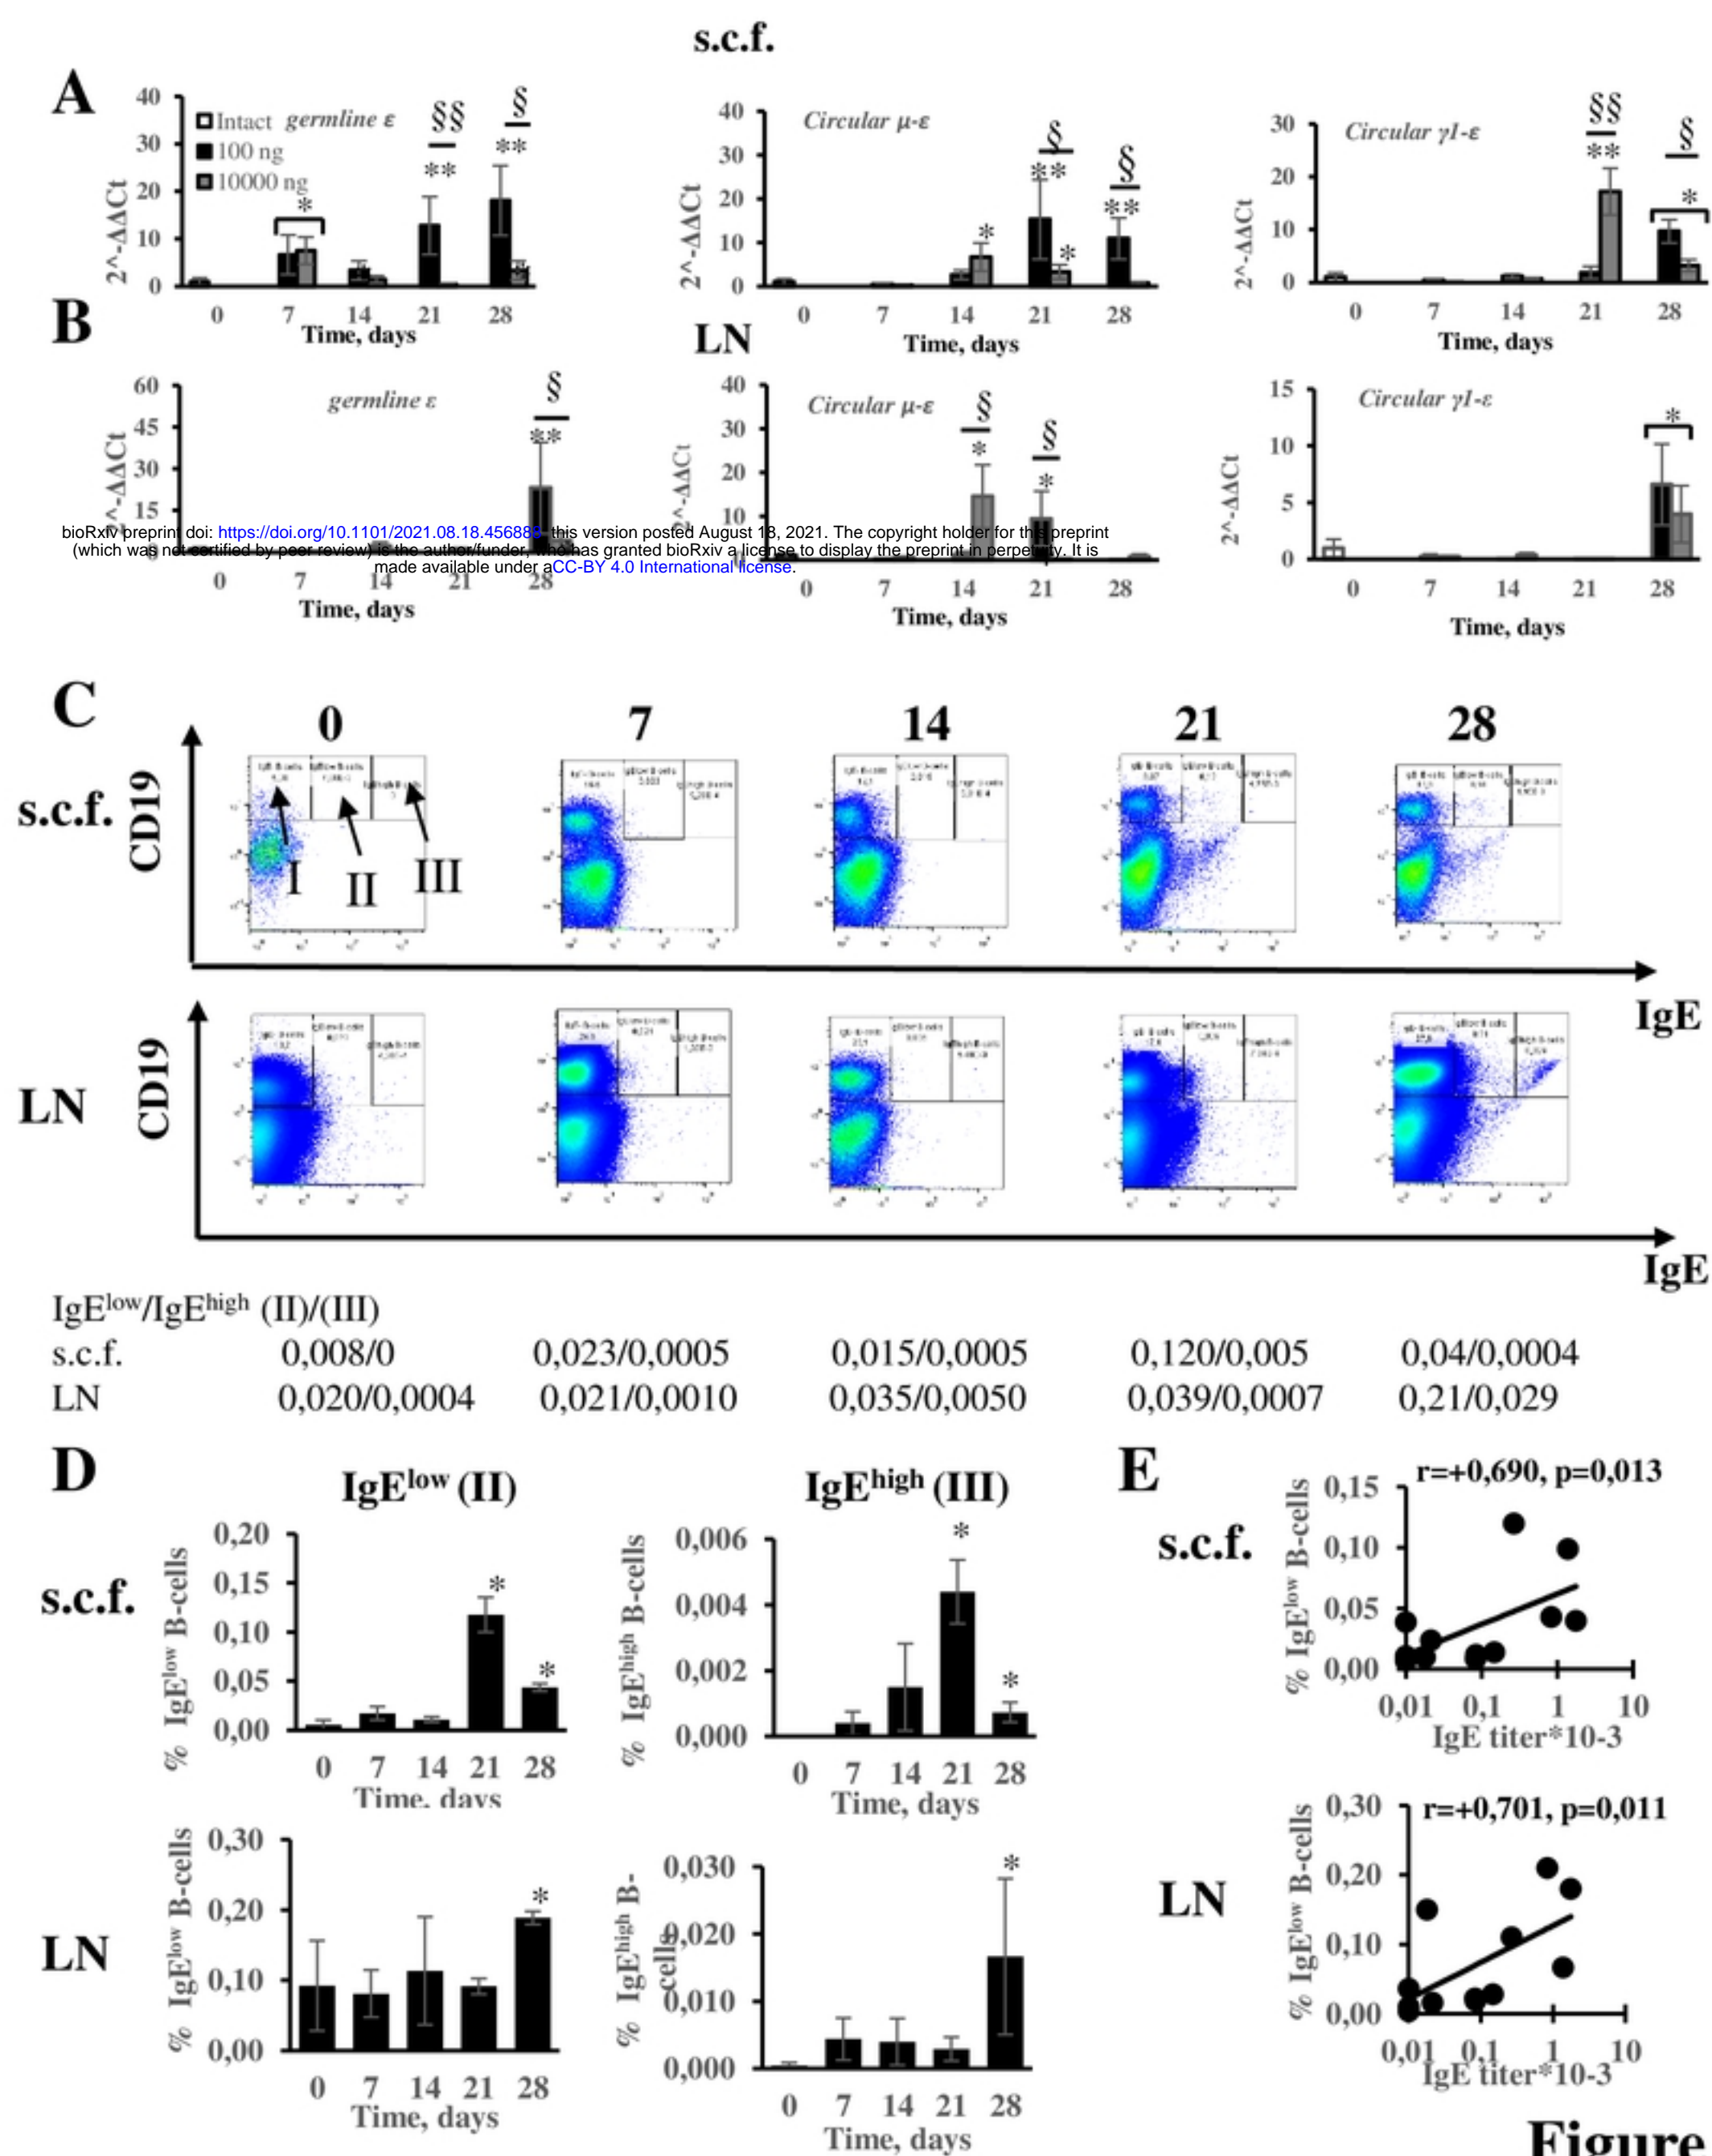

bioRxiv preprint doi: <https://doi.org/10.1101/2021.08.18.456888>; this version posted August 18, 2021. The copyright holder for this preprint (which was not certified by peer review) is the author/funder, who has granted bioRxiv a license to display the preprint in perpetuity. It is made available under aCC-BY 4.0 International license.

Figure 2

Figure 2

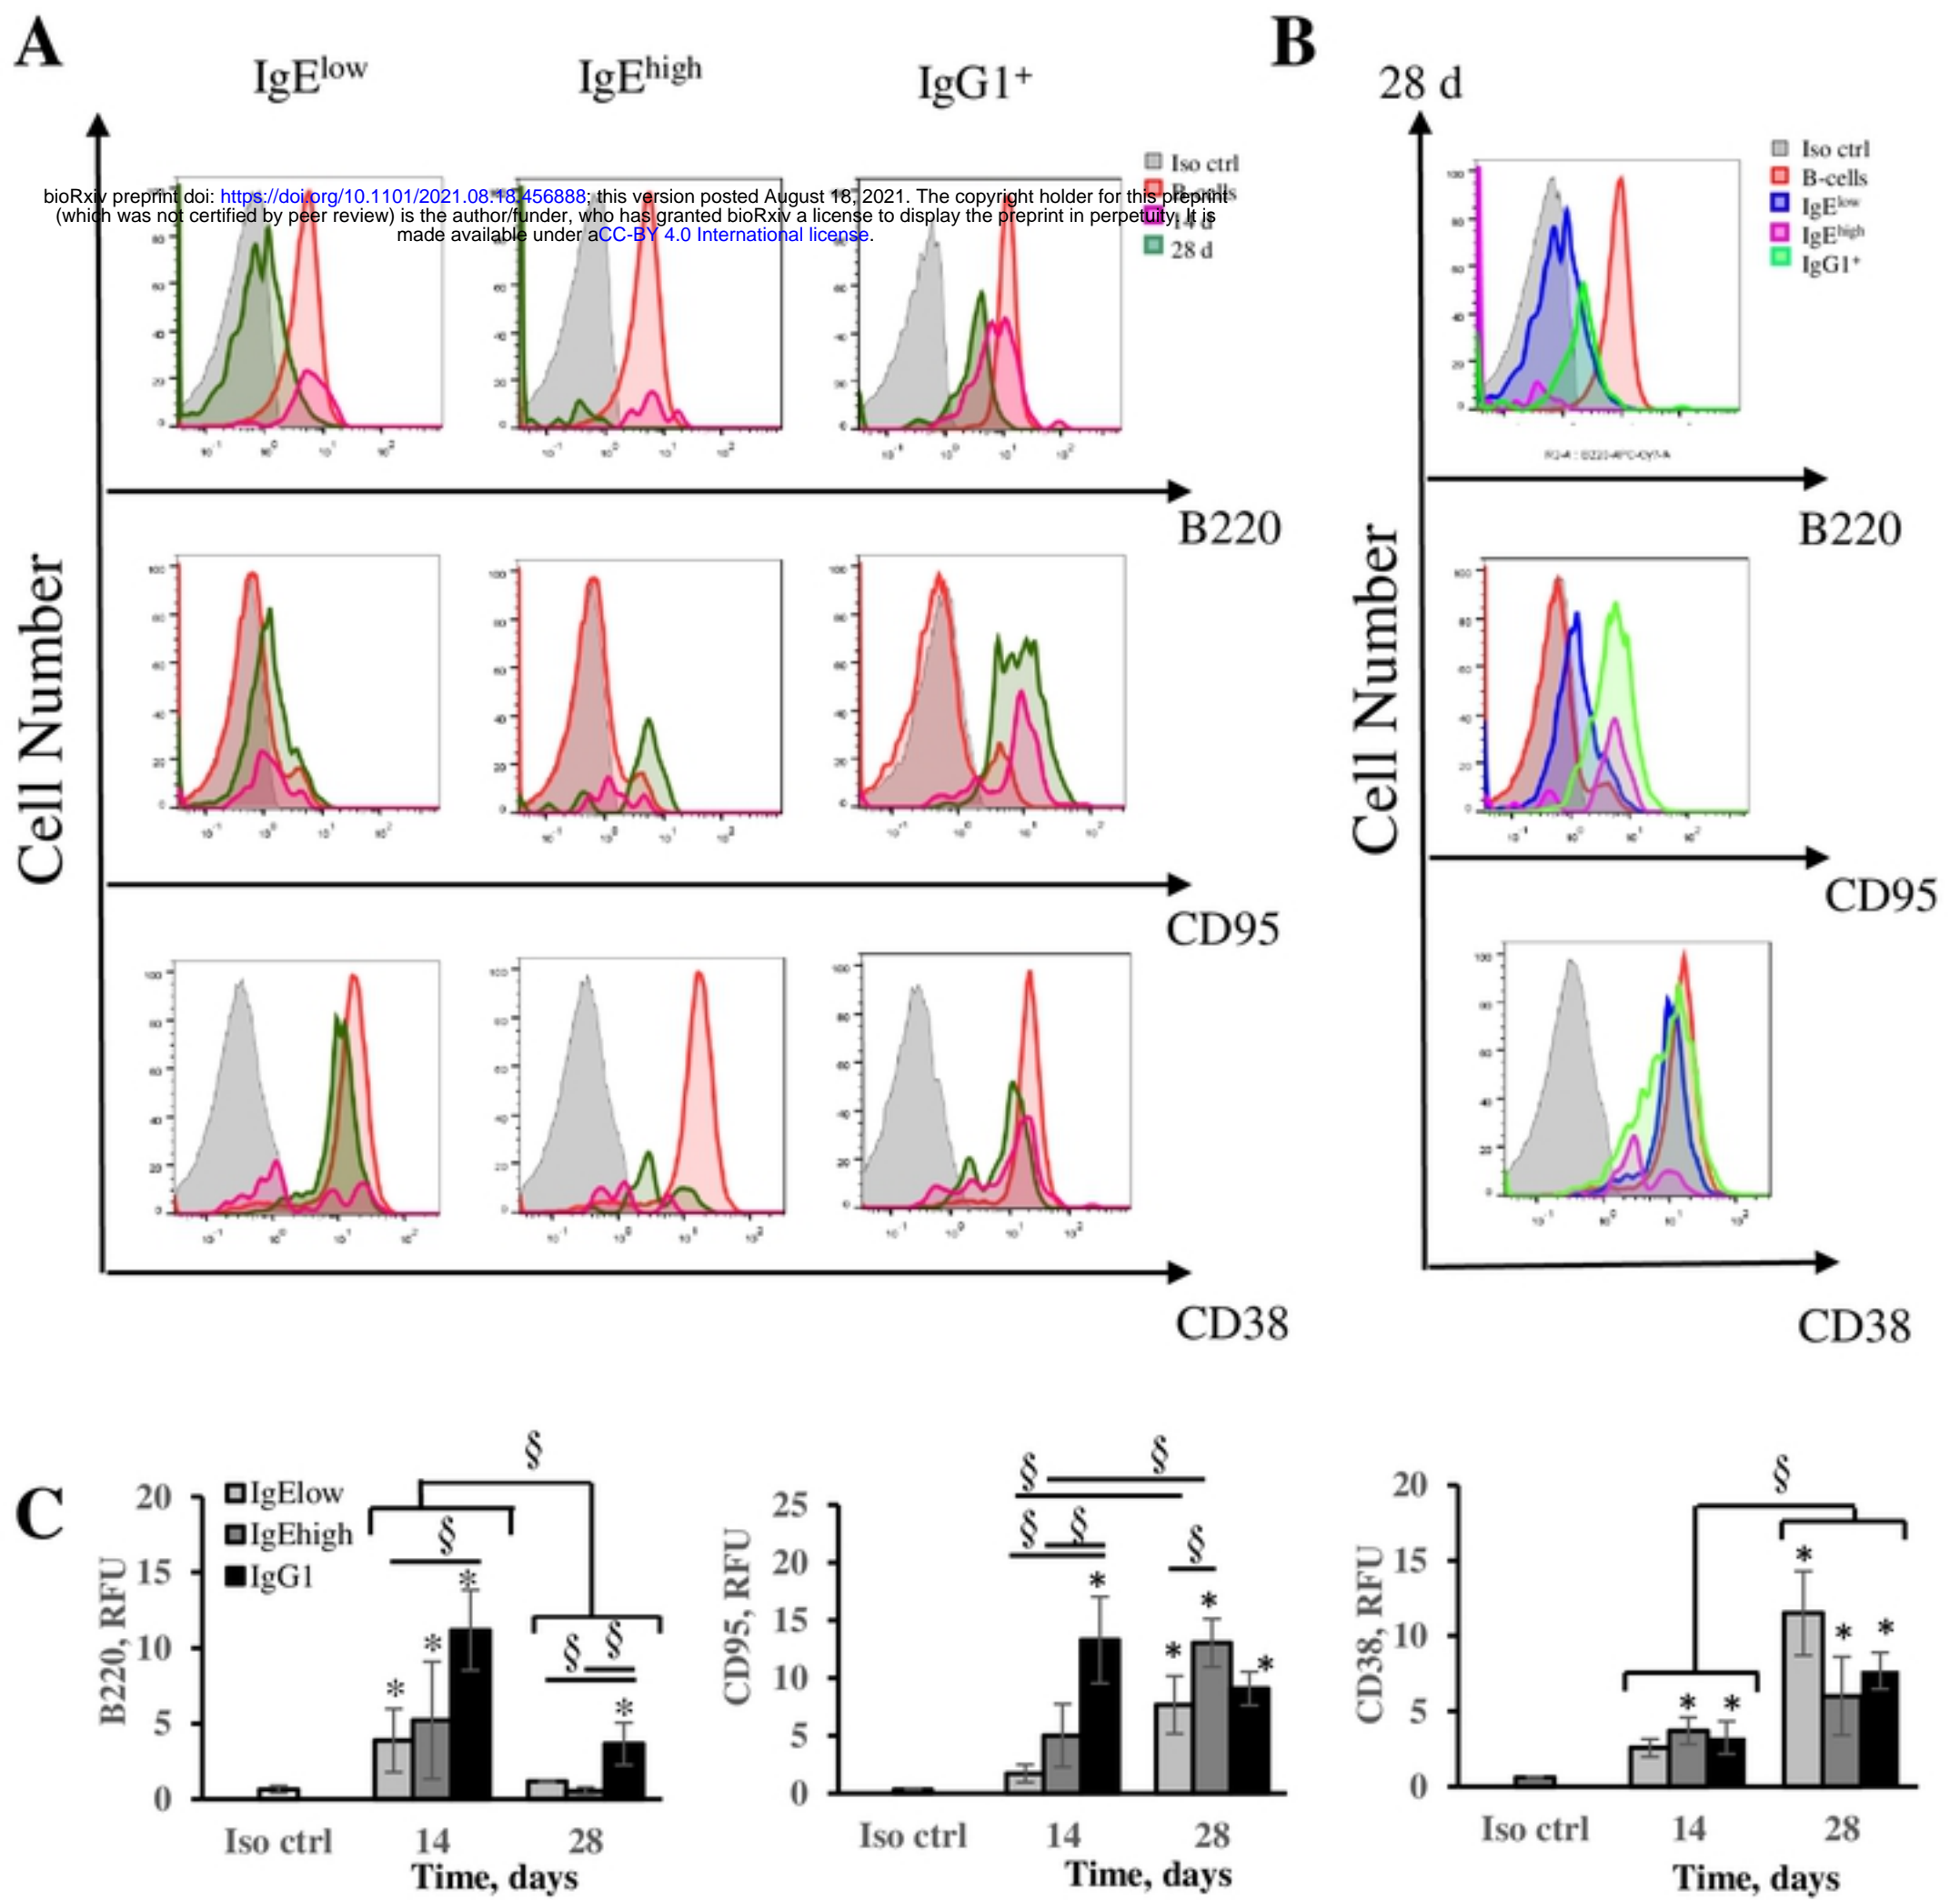

**Figure 4**

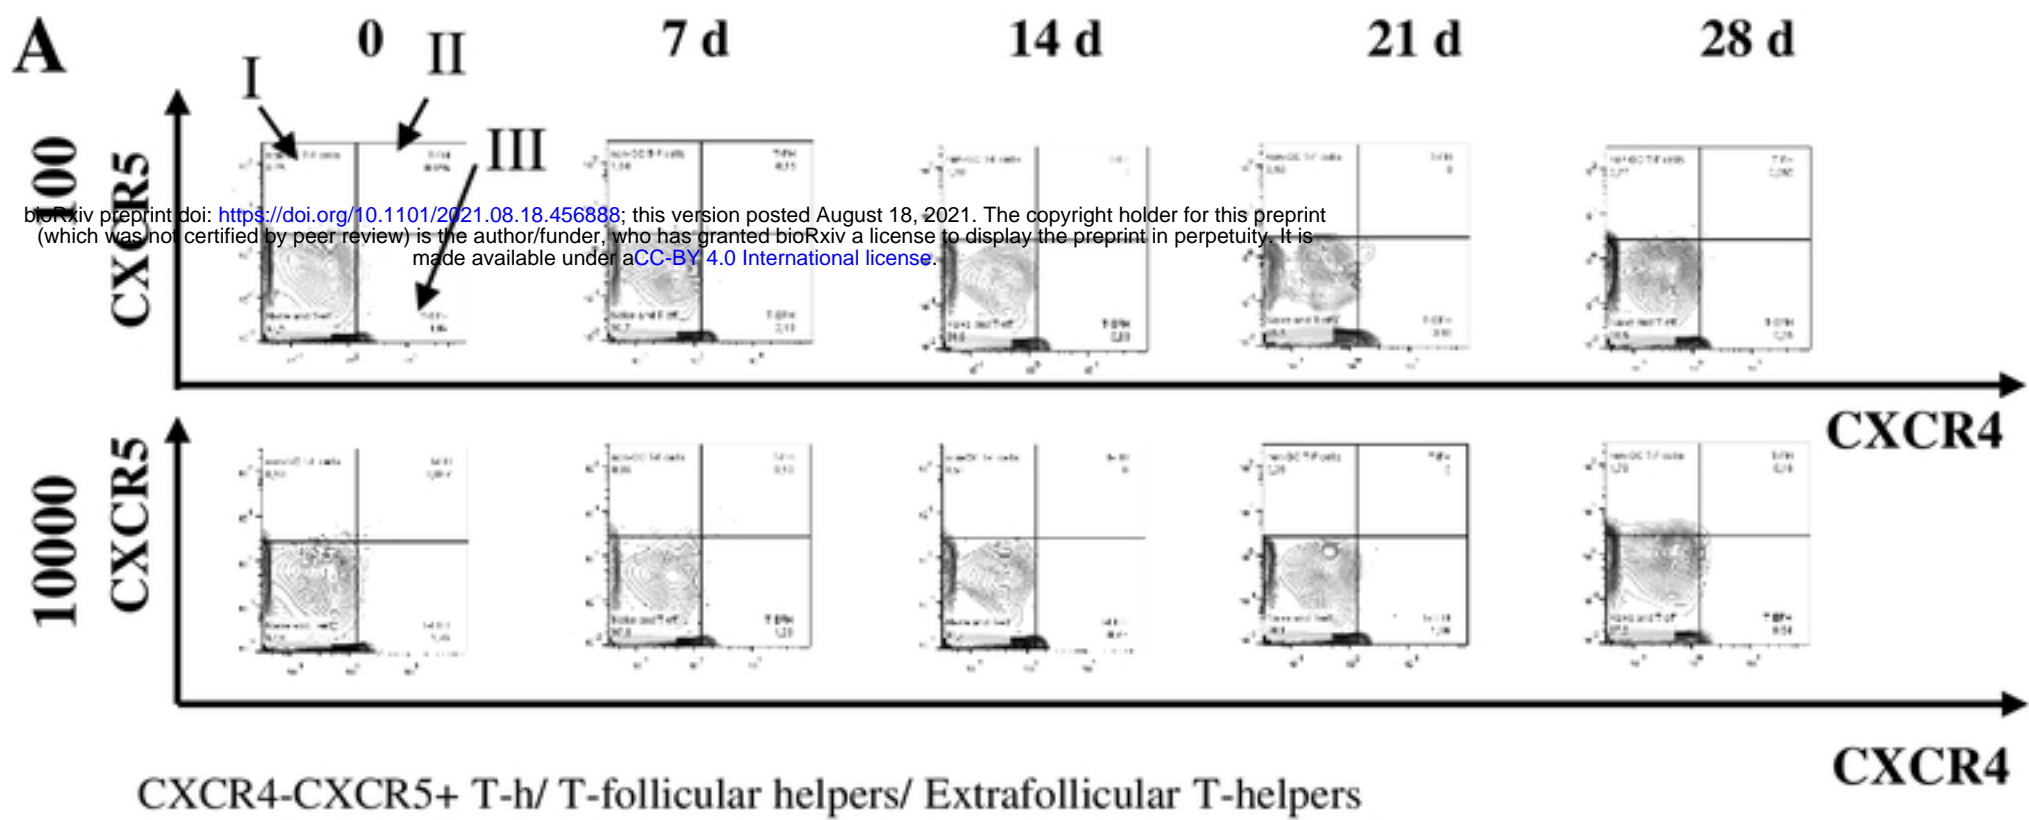

|       |                |                |                |                |                |
|-------|----------------|----------------|----------------|----------------|----------------|
| 100   | 0,75/0,06/1,69 | 1,04/0,15/2,13 | 0,60/0,00/0,83 | 0,50/0,00/3,98 | 0,77/0,06/0,66 |
| 10000 | 0,50/0,06/1,79 | 0,86/0,10/1,23 | 0,53/0,00/0,76 | 0,26/0,00/1,66 | 1,79/0,16/0,54 |

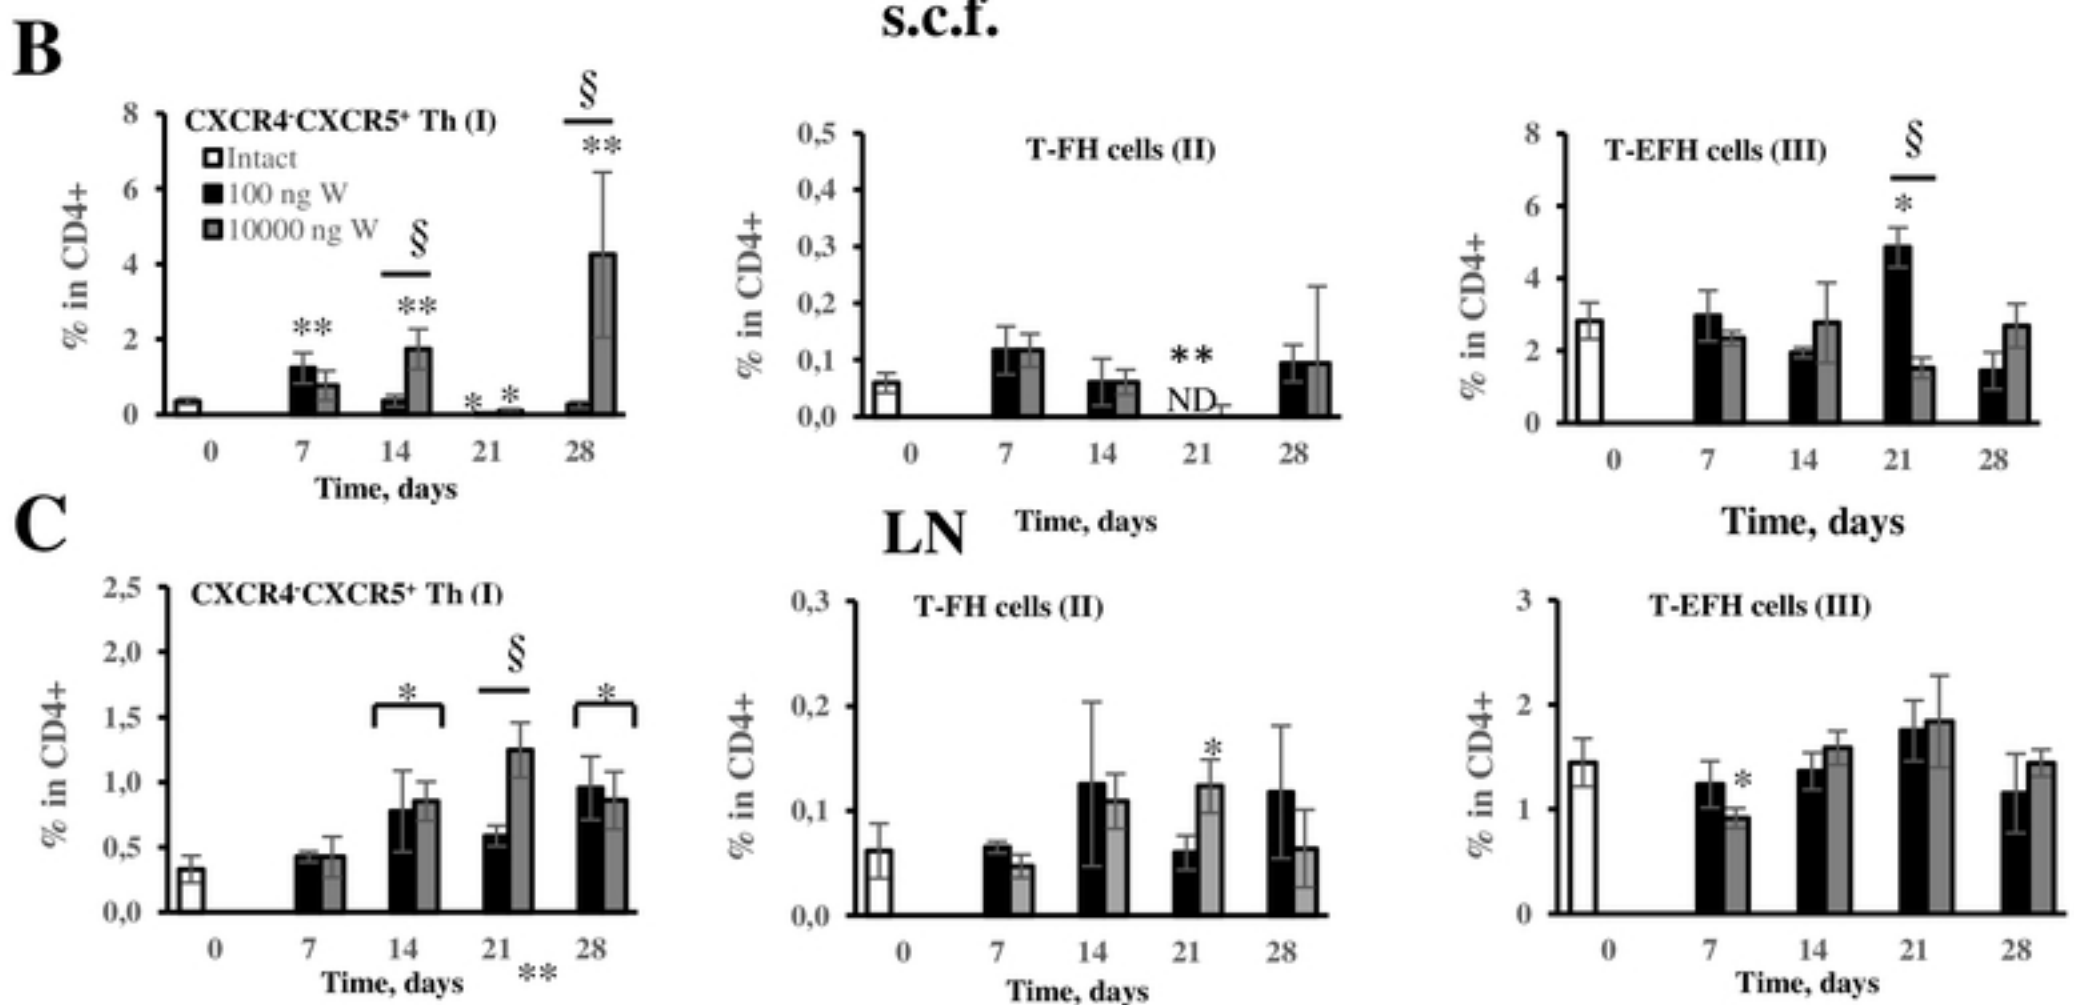

**Figure 6**



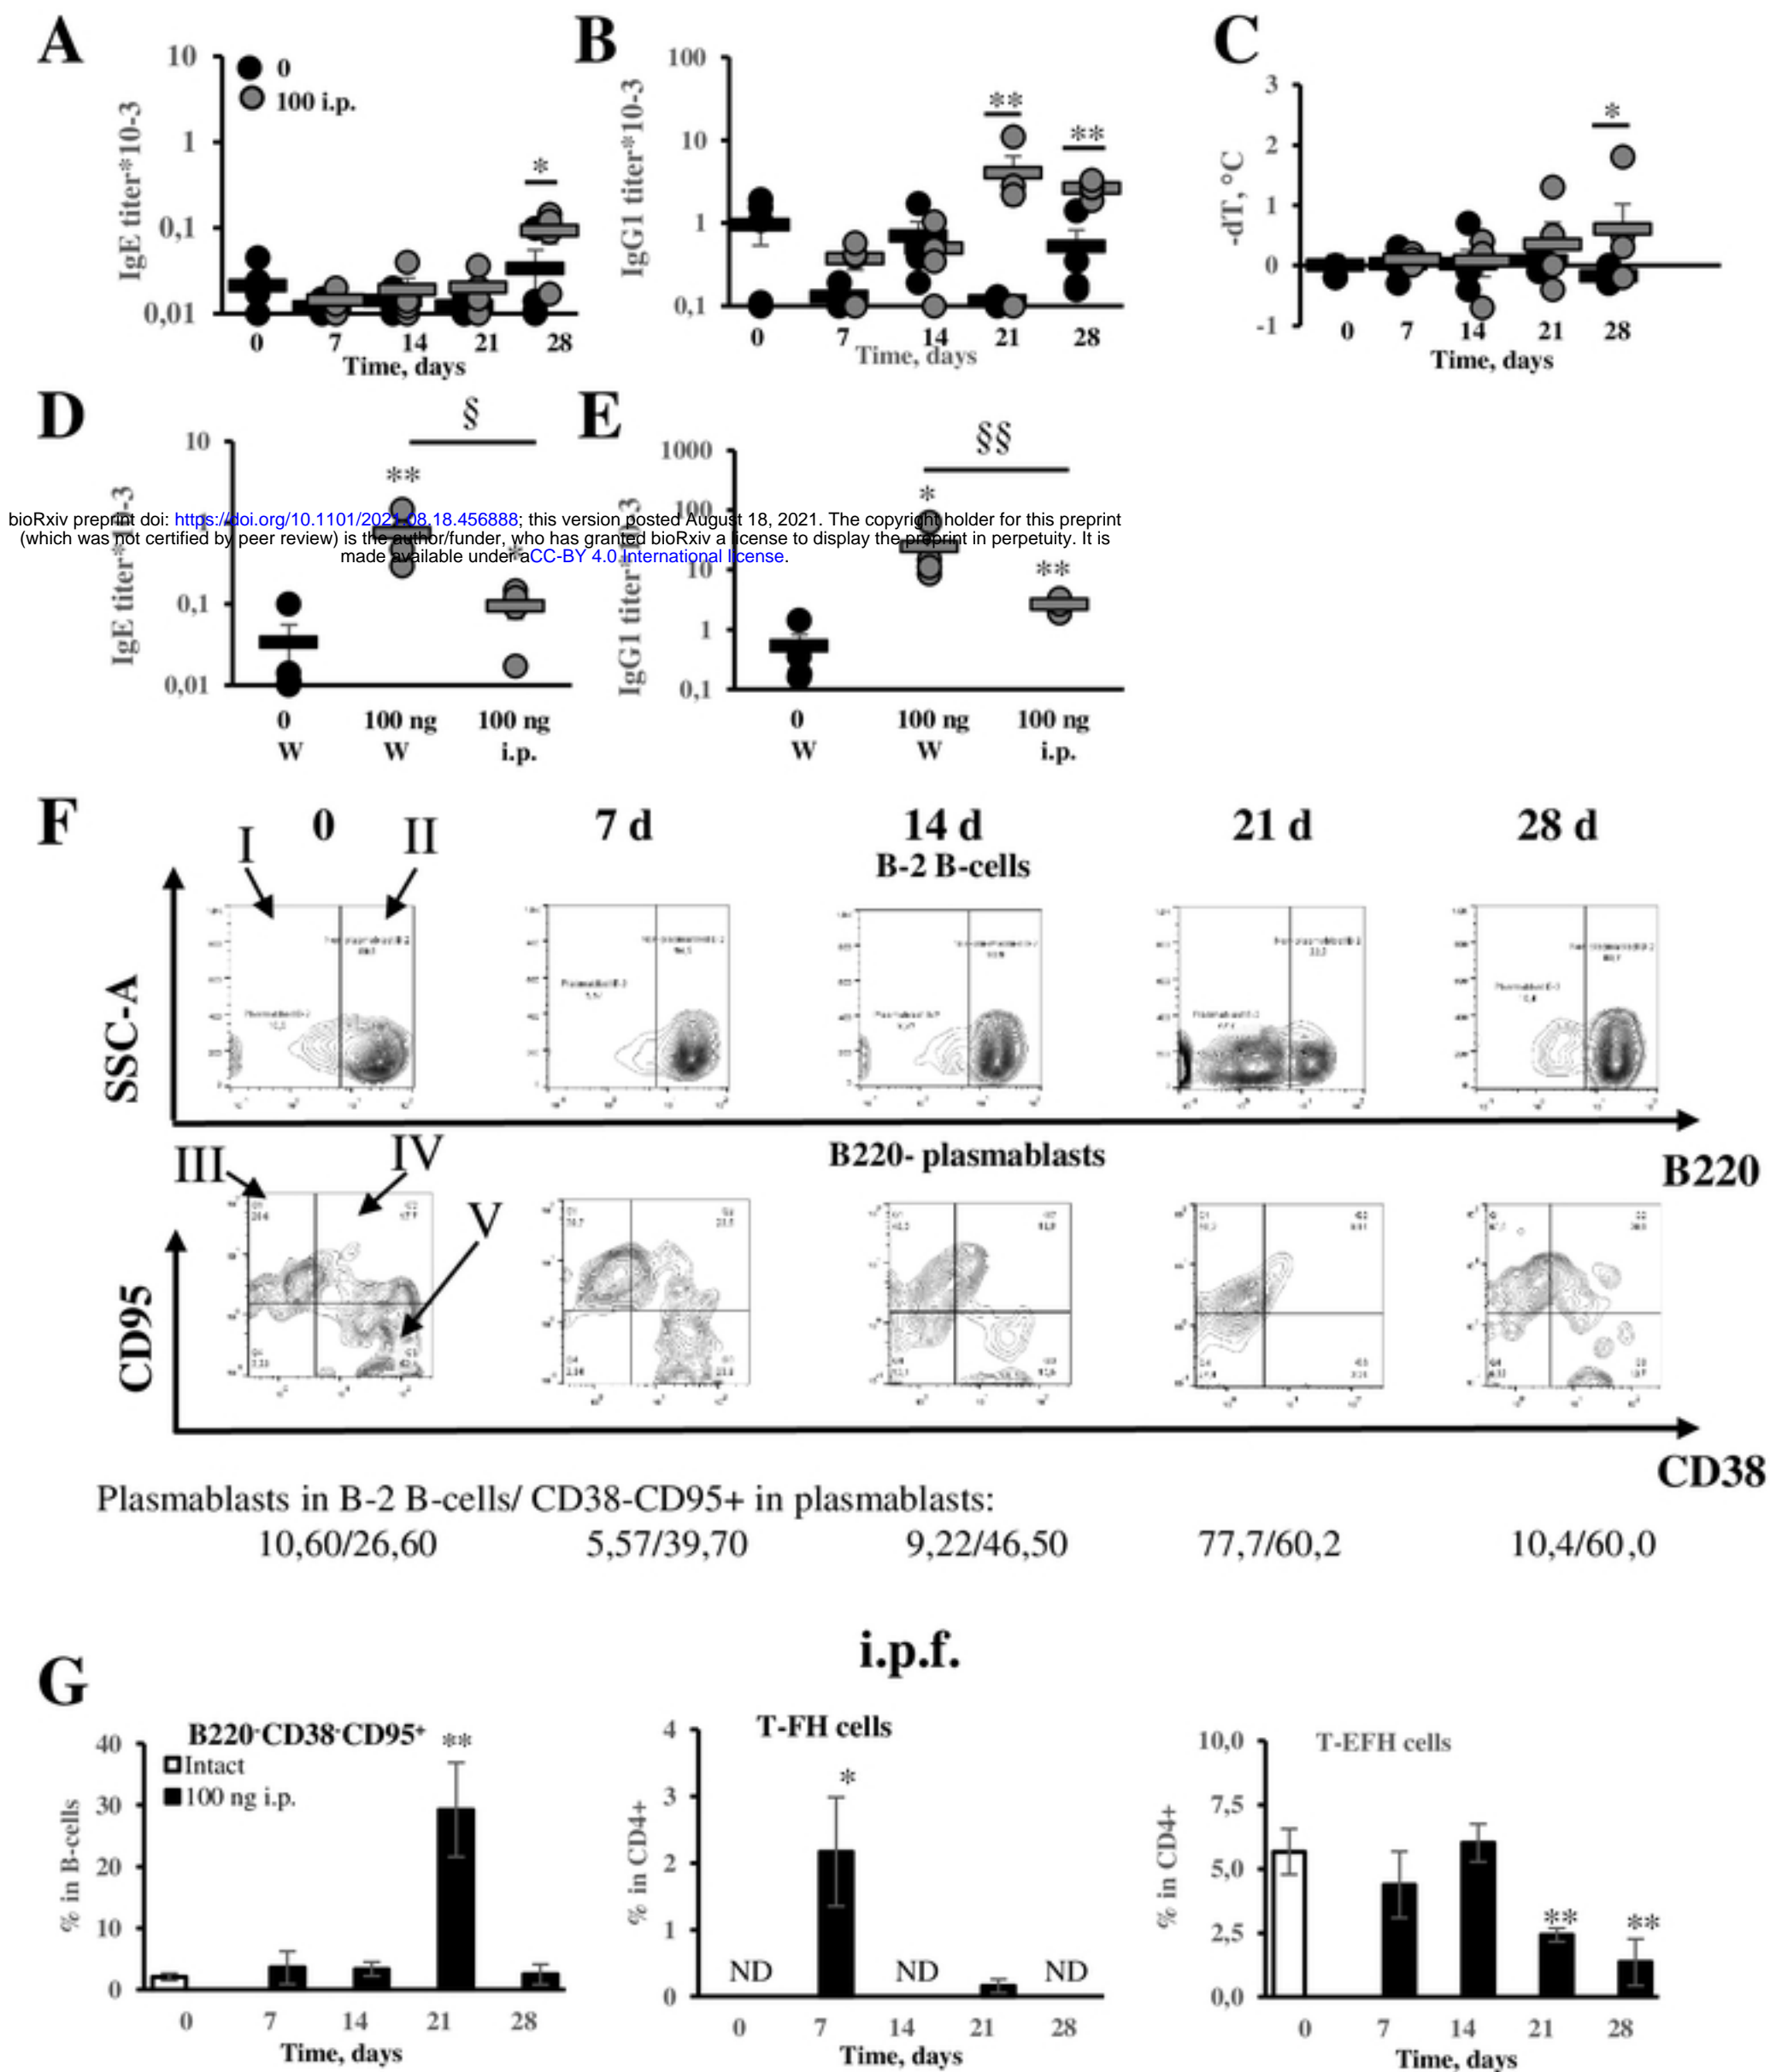

Figure 7

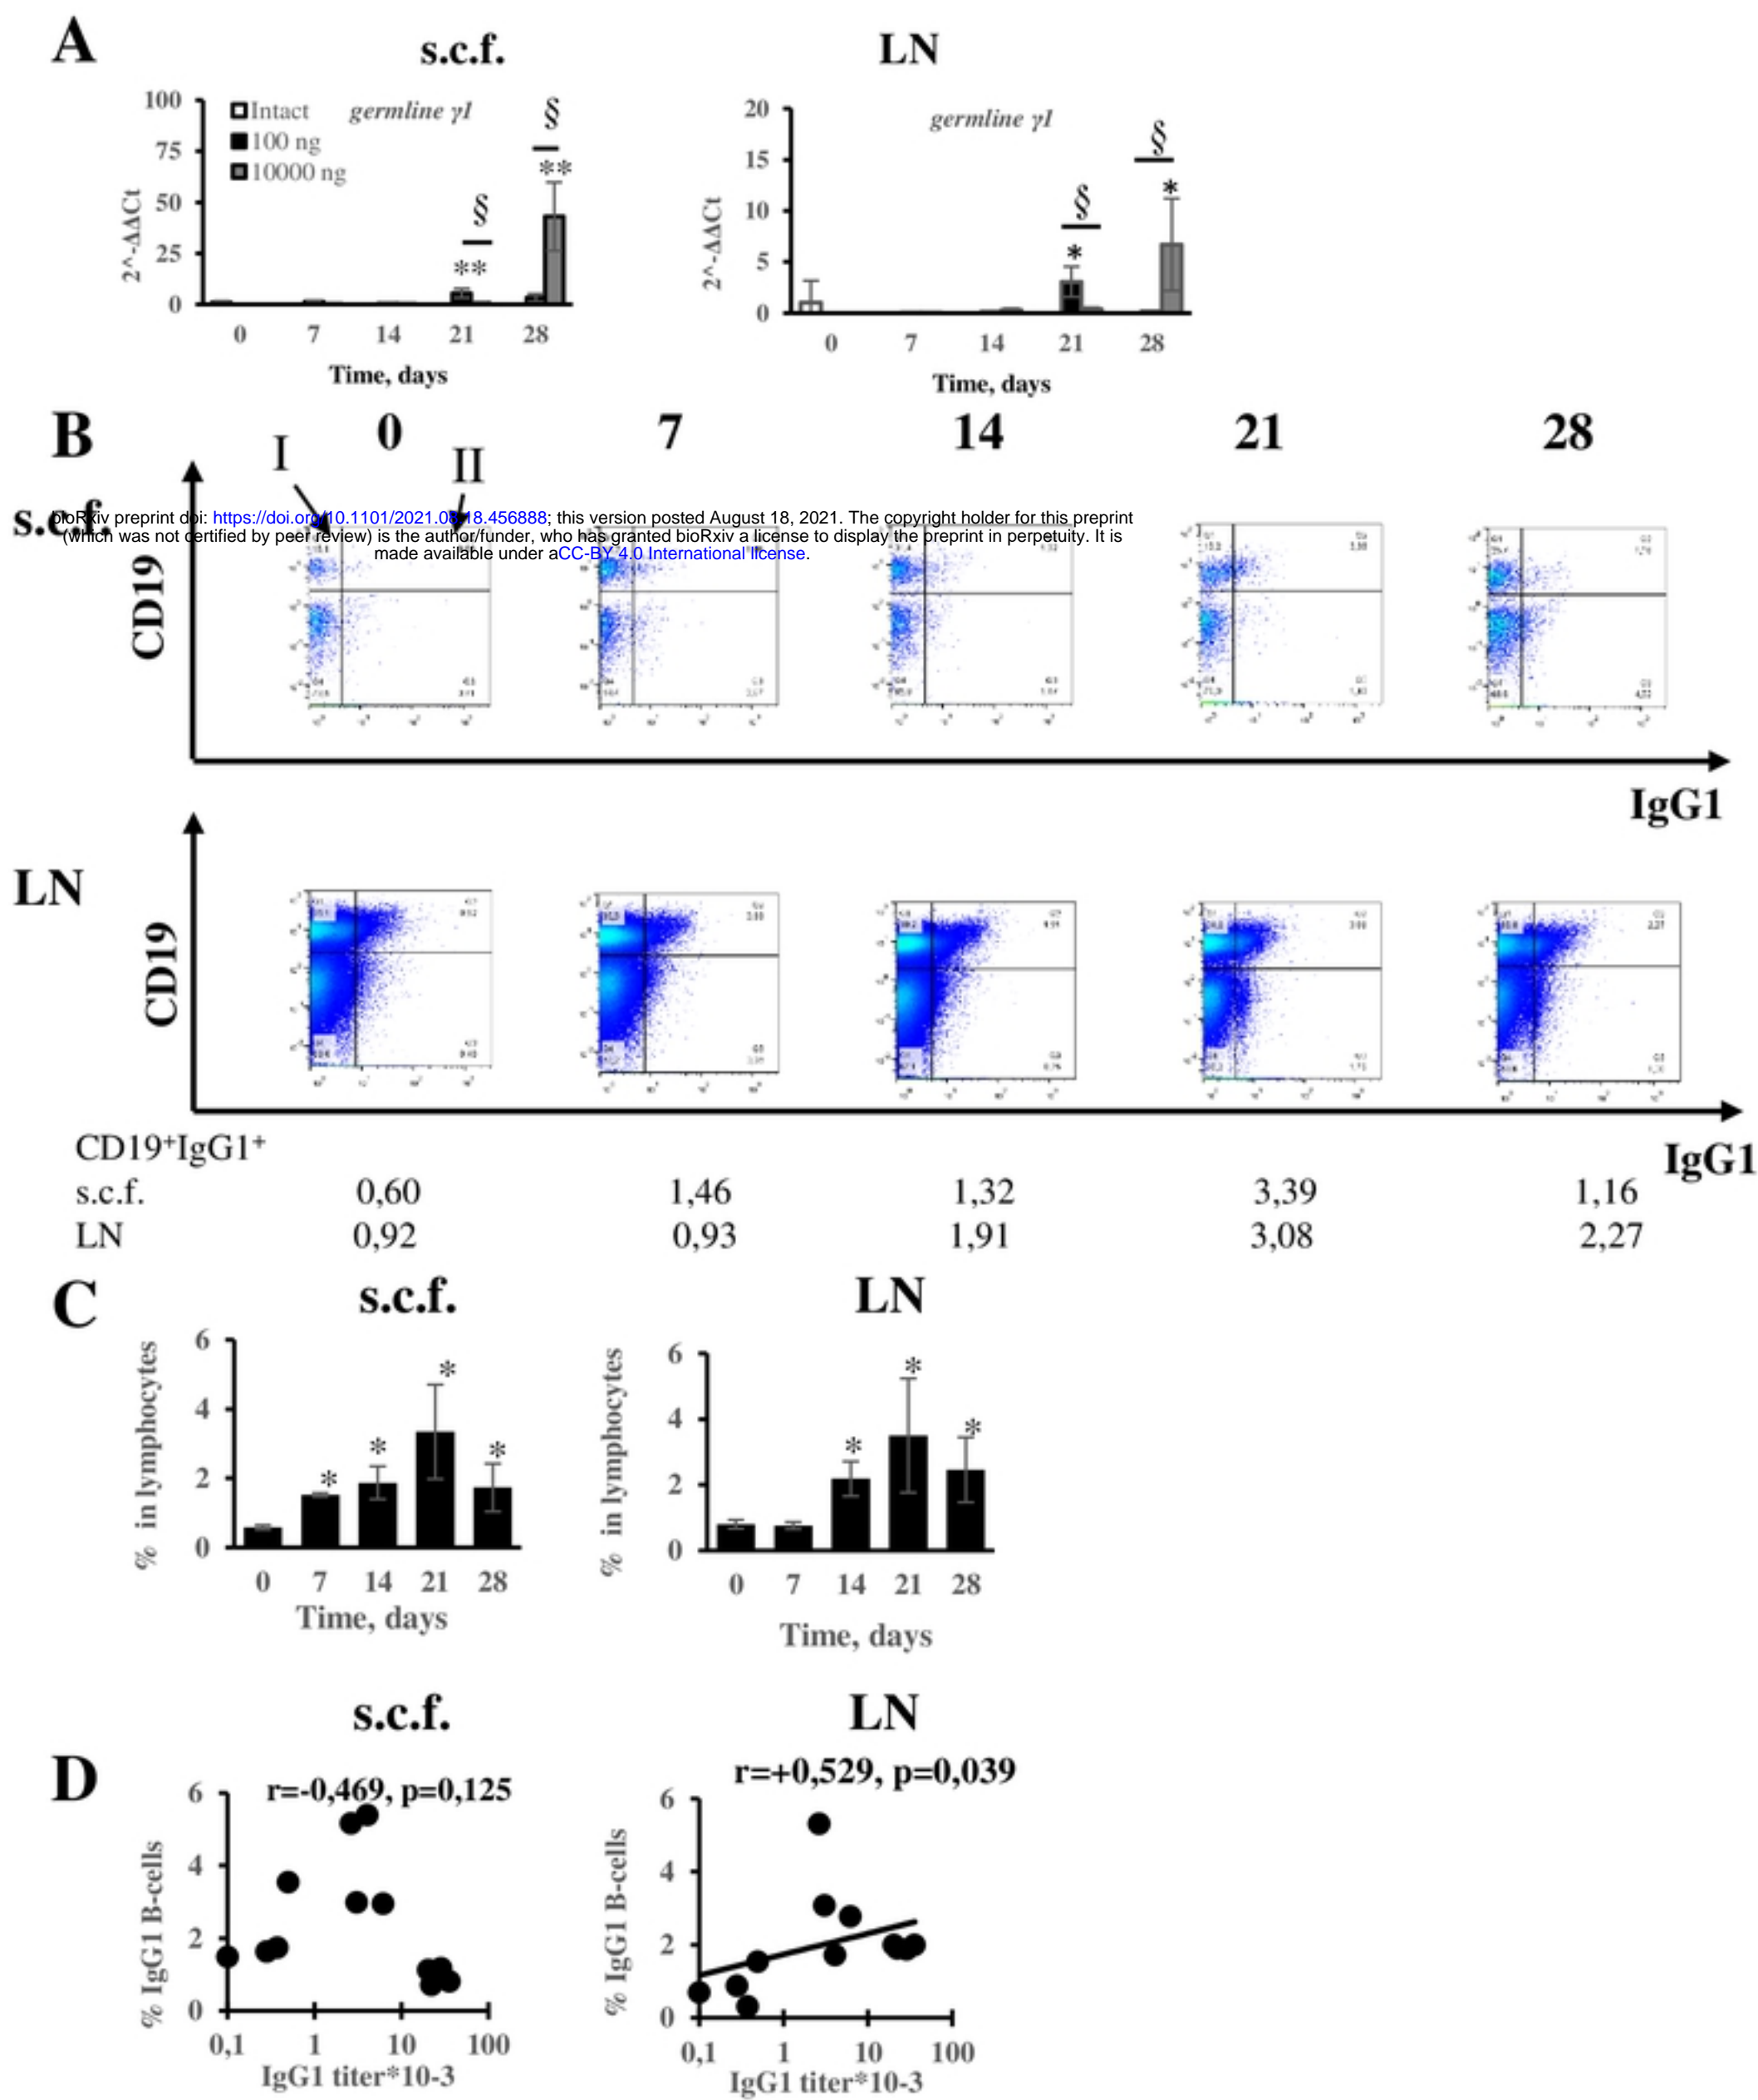

**Figure 3**

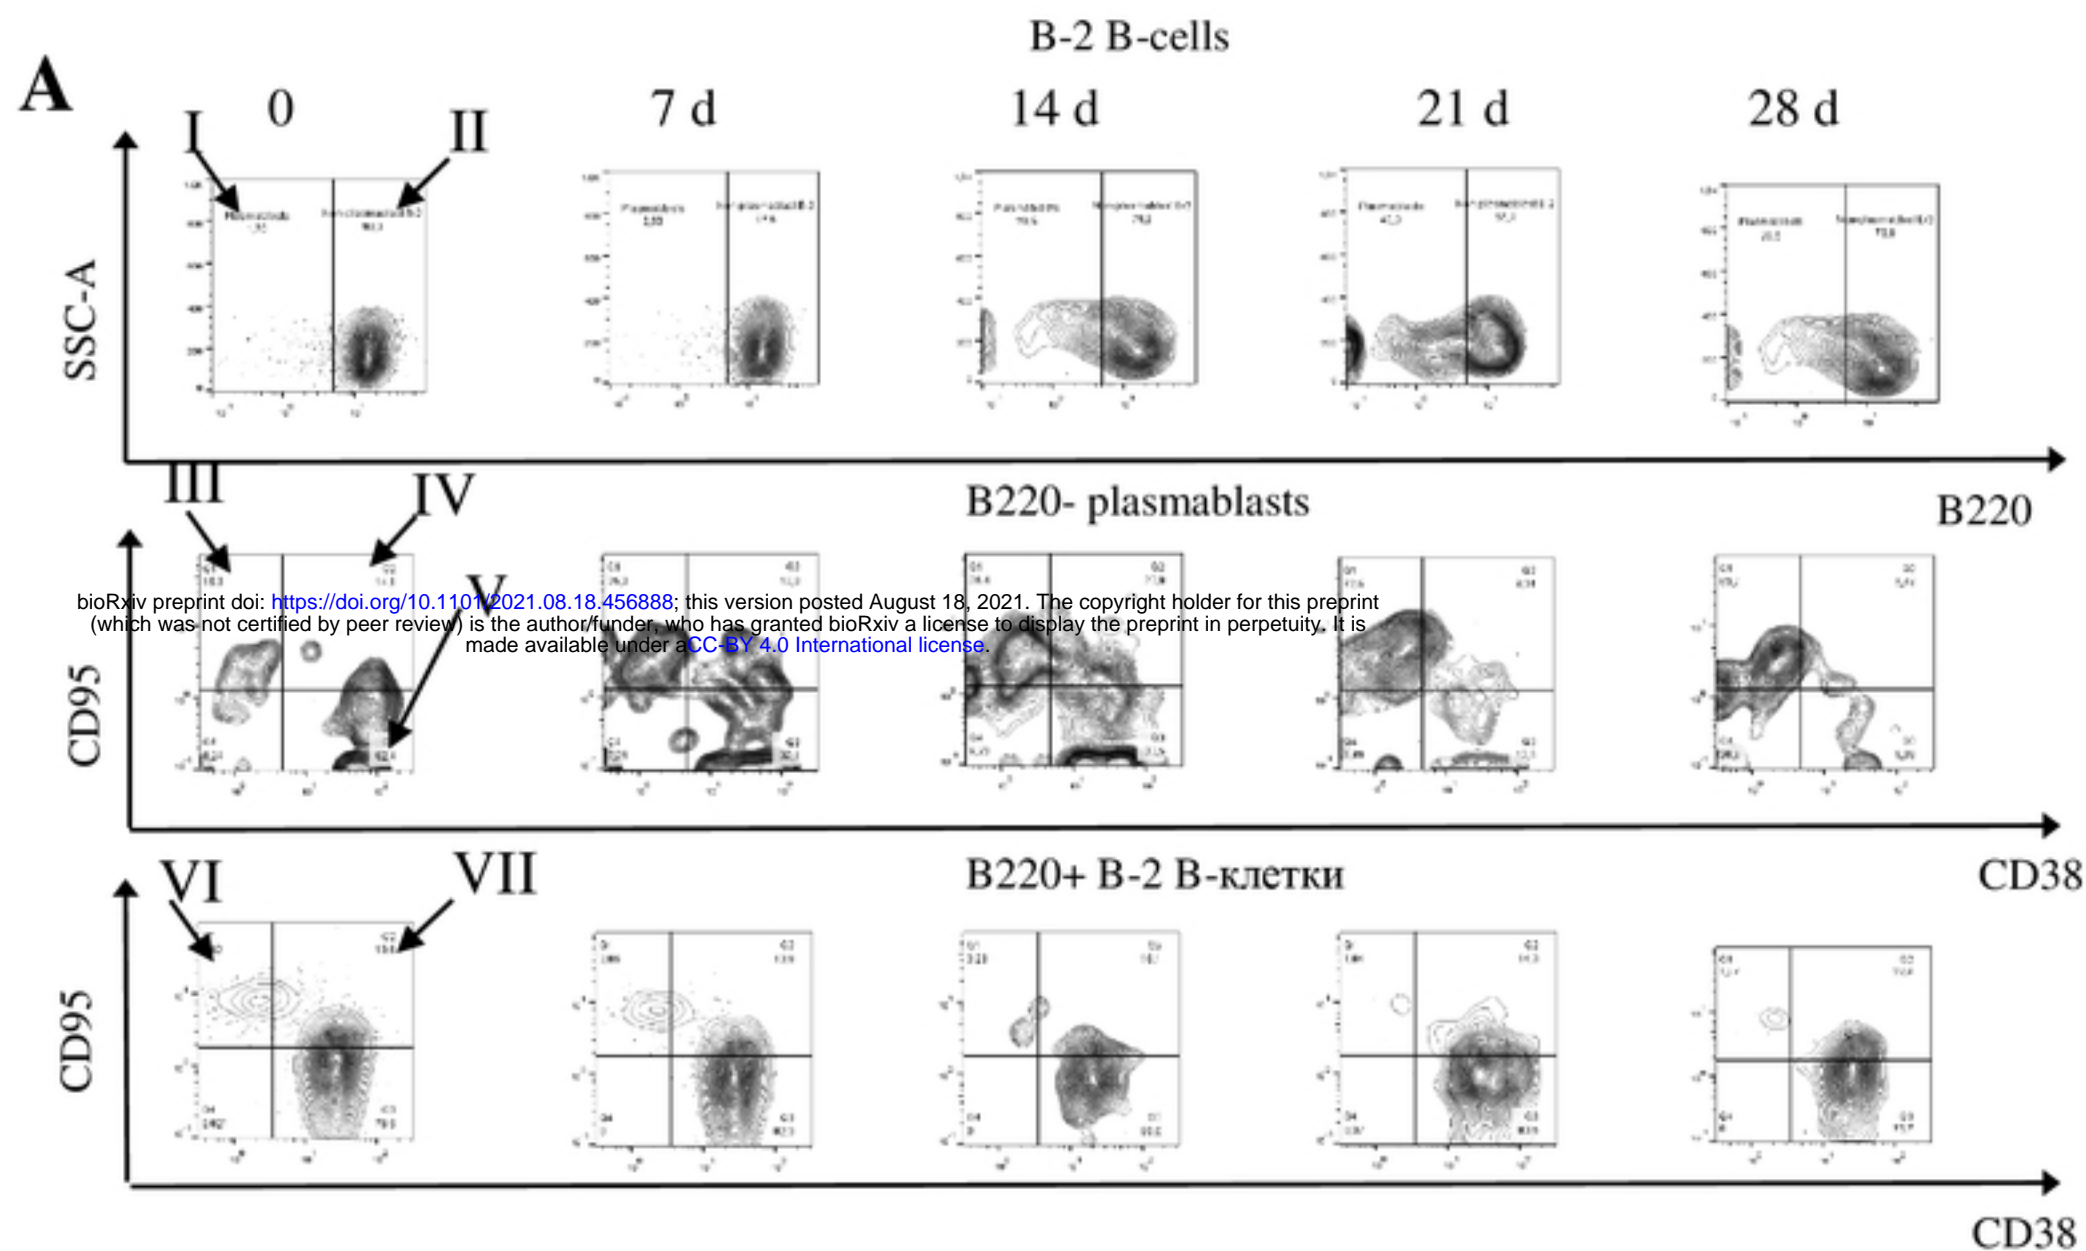

bioRxiv preprint doi: <https://doi.org/10.1101/2021.08.18.456888>; this version posted August 18, 2021. The copyright holder for this preprint (which was not certified by peer review) is the author/funder, who has granted bioRxiv a license to display the preprint in perpetuity. It is made available under aCC-BY 4.0 International license.

Plasmablasts in B-2 B-cells (I)/CD38-CD95+ in plasmablasts (III)/germinal centers in not plasmablast B-2 (VI)

1,70/15,30/3,82 2,59/35,30/3,86 20,50/36,40/3,23 45,00/72,50/1,84 7,36/63,70/1,87

s.c.f.

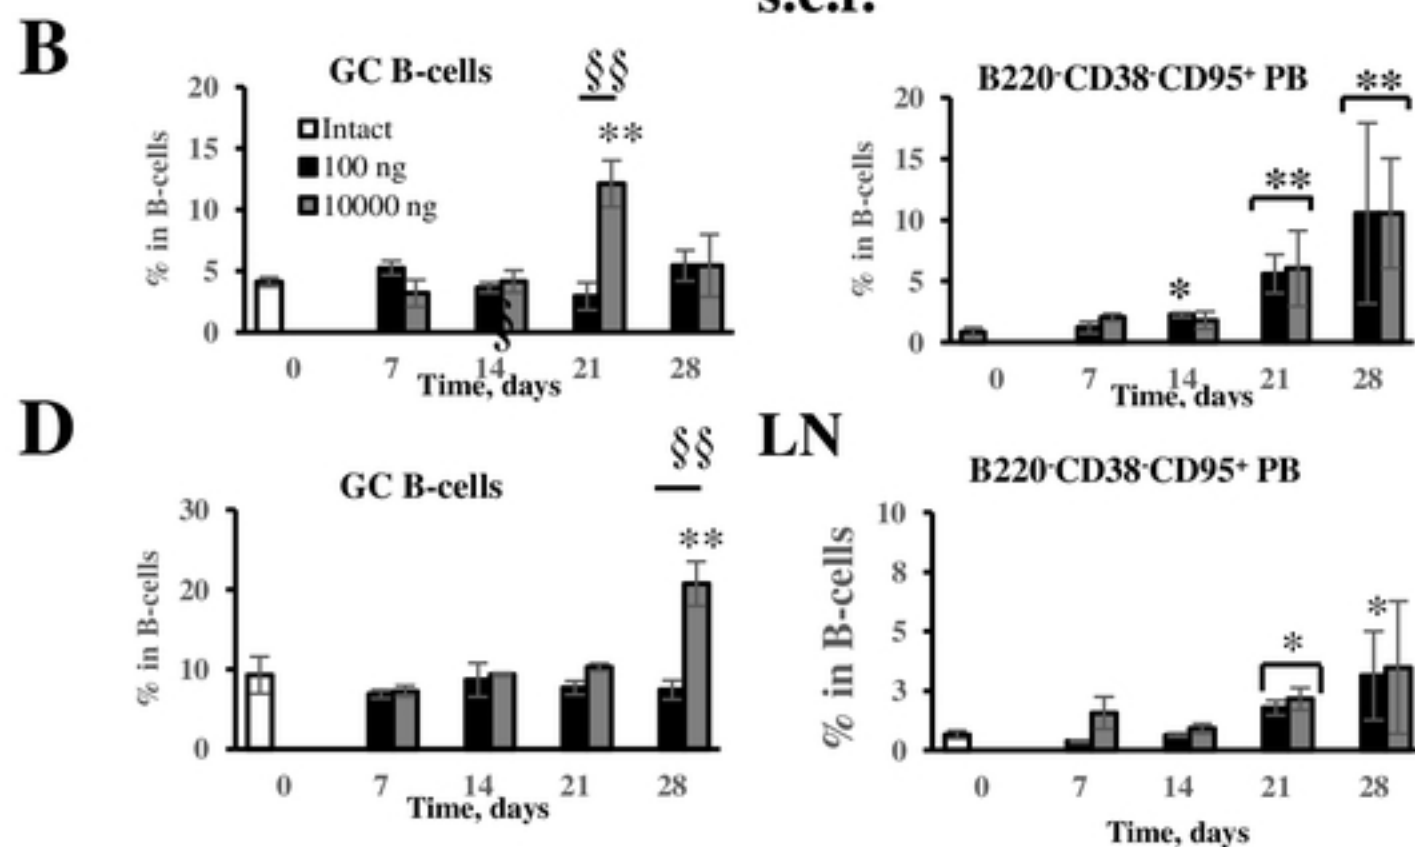

**Figure 5**
